# Supplementary material for: Proteomics Analyses of the Opportunistic Pathogen Burkholderia vietnamiensis Using Protein Fractionations and Mass Spectrometry
Source: Hindawi journal article supplement (doi:10.1155/2011/701928), 2011-01-01
Supplement: f1 [file 701928.f1.pdf]

**Proteins identified from the proteomic analysis of  
*Burkholderia vietnamiensis* G4**

| <b>Locus</b> | <b>% coverage</b> | <b>Description</b>                                                                                 |
|--------------|-------------------|----------------------------------------------------------------------------------------------------|
| gj 115350111 | 81.5              | histone family protein DNA-binding protein [ <i>B.ambifaria</i> AMMD]                              |
| gj 115352352 | 79.9              | ketol-acid reductoisomerase [ <i>B.ambifaria</i> AMMD]                                             |
| gj 115350437 | 79                | protein of unknown function DUF796 [ <i>B.ambifaria</i> AMMD]                                      |
| gj 115351862 | 79                | 30S ribosomal protein S6 [ <i>B.ambifaria</i> AMMD]                                                |
| gj 115351796 | 78.8              | RNA-binding protein Hfq [ <i>B.ambifaria</i> AMMD]                                                 |
| gj 115351817 | 77.8              | thioredoxin [ <i>B.ambifaria</i> AMMD]                                                             |
| gj 115350333 | 77.5              | 50S ribosomal protein L24 [ <i>B.ambifaria</i> AMMD]                                               |
| gj 115352972 | 76.8              | nitrogen regulatory protein P-II [ <i>B.ambifaria</i> AMMD]                                        |
| gj 115351979 | 75.8              | alkyl hydroperoxide reductase/ Thiol specific antioxidant/ Mal allergen [ <i>B.ambifaria</i> AMMD] |
| gj 115350871 | 75.4              | riboflavin synthase subunit beta [ <i>B.ambifaria</i> AMMD]                                        |
| gj 115350462 | 74.6              | cold-shock DNA-binding domain protein [ <i>B.ambifaria</i> AMMD]                                   |
| gj 3916735   | 74.2              | 10 kDa heat shock protein GroES [ <i>B.cepacia</i> ]                                               |
| gj 115350323 | 73.8              | 50S ribosomal protein L4 [ <i>B.ambifaria</i> AMMD]                                                |
| gj 115350324 | 73.1              | 50S ribosomal protein L23 [ <i>B.ambifaria</i> AMMD]                                               |
| gj 115350339 | 72.7              | 30S ribosomal protein S5 [ <i>B.ambifaria</i> AMMD]                                                |
| gj 115352600 | 72.7              | 50S ribosomal protein L28 [ <i>B.ambifaria</i> AMMD]                                               |
| gj 115358060 | 69.8              | malate dehydrogenase [ <i>B.ambifaria</i> AMMD]                                                    |
| gj 115350334 | 69.3              | 50S ribosomal protein L5 [ <i>B.ambifaria</i> AMMD]                                                |
| gj 134295913 | 68.7              | hypothetical protein Bcep1808_1809 [ <i>B.vietnamiensis</i> G4]                                    |
| gj 115350326 | 68.1              | 30S ribosomal protein S19 [ <i>B.ambifaria</i> AMMD]                                               |
| gj 115352903 | 68.1              | sigma 54 modulation protein/ribosomal protein S30EA [ <i>B.ambifaria</i> AMMD]                     |
| gj 3916736   | 67.2              | 57 kDa heat shock protein GroEL [ <i>B.cepacia</i> ]                                               |
| gj 115352195 | 66.7              | phosphopyruvate hydratase [ <i>B.ambifaria</i> AMMD]                                               |
| gj 115352222 | 66                | phasin family protein [ <i>B.ambifaria</i> AMMD]                                                   |
| gj 115352747 | 65.7              | succinyl-CoA synthetase subunit beta [ <i>B.ambifaria</i> AMMD]                                    |
| gj 115350593 | 64.9              | glyceraldehyde-3-phosphate dehydrogenase, type I [ <i>B.ambifaria</i> AMMD]                        |
| gj 587502    | 64.6              | ATPase beta-subunit [ <i>B.cepacia</i> ]                                                           |
| gj 115350322 | 64.1              | 50S ribosomal protein L3 [ <i>B.ambifaria</i> AMMD]                                                |
| gj 115350312 | 63.3              | 50S ribosomal protein L10 [ <i>B.ambifaria</i> AMMD]                                               |
| gj 134293952 | 63                | porin, Gram-negative type [ <i>B.vietnamiensis</i> G4]                                             |
| gj 134296389 | 63                | hypothetical protein Bcep1808_2290 [ <i>B.vietnamiensis</i> G4]                                    |
| gj 115350318 | 62.8              | 30S ribosomal protein S7 [ <i>B.ambifaria</i> AMMD]                                                |
| gj 115350348 | 62.5              | DNA-directed RNA polymerase subunit alpha [ <i>B.ambifaria</i> AMMD]                               |
| gj 115351981 | 62.1              | 2C-methyl-D-erythritol 2,4-cyclodiphosphate synthase [ <i>B.ambifaria</i> AMMD]                    |
| gj 115352285 | 62                | bacterioferritin [ <i>B.ambifaria</i> AMMD]                                                        |
| gj 115350327 | 61.5              | 50S ribosomal protein L22 [ <i>B.ambifaria</i> AMMD]                                               |
| gj 115360798 | 60.9              | Extracellular ligand-binding receptor [ <i>B.ambifaria</i> AMMD]                                   |
| gj 134292382 | 60.8              | hypothetical protein Bcep1808_3668 [ <i>B.vietnamiensis</i> G4]                                    |

|              |      |                                                                                                         |
|--------------|------|---------------------------------------------------------------------------------------------------------|
| gj 115350341 | 60.4 | 50S ribosomal protein L15 [ <i>B.ambifaria</i> AMMD]                                                    |
| gj 115351563 | 60.3 | putative serine protein kinase, PrkA [ <i>B.ambifaria</i> AMMD]                                         |
| gj 115350332 | 59.8 | 50S ribosomal protein L14 [ <i>B.ambifaria</i> AMMD]                                                    |
| gj 115350977 | 59.2 | 30S ribosomal protein S1 [ <i>B.ambifaria</i> AMMD]                                                     |
| gj 115350149 | 59   | F0F1 ATP synthase subunit B [ <i>B.ambifaria</i> AMMD]                                                  |
| gj 115350328 | 59   | 30S ribosomal protein S3 [ <i>B.ambifaria</i> AMMD]                                                     |
| gj 115350345 | 58.7 | 30S ribosomal protein S13 [ <i>B.ambifaria</i> AMMD]                                                    |
| gj 115350417 | 58.6 | Glutathione S-transferase, N-terminal domain [ <i>B.ambifaria</i> AMMD]                                 |
| gj 115351963 | 58   | trigger factor [ <i>B.ambifaria</i> AMMD]                                                               |
| gj 115350338 | 57.9 | 50S ribosomal protein L18 [ <i>B.ambifaria</i> AMMD]                                                    |
| gj 115350618 | 57.9 | extracellular solute-binding protein, family 3 [ <i>B.ambifaria</i> AMMD]                               |
| gj 115350330 | 57.8 | 50S ribosomal protein L29 [ <i>B.ambifaria</i> AMMD]                                                    |
| gj 115352918 | 57   | phosphopantetheine adenyltransferase [ <i>B.ambifaria</i> AMMD]                                         |
| gj 115350337 | 56.8 | 50S ribosomal protein L6 [ <i>B.ambifaria</i> AMMD]                                                     |
| gj 15705849  | 56.8 | RecA [ <i>B.cepacia</i> ]                                                                               |
| gj 115353086 | 56.4 | hypothetical protein Bamb_3035 [ <i>B.ambifaria</i> AMMD]                                               |
| gj 115350539 | 56.3 | 50S ribosomal protein L27 [ <i>B.ambifaria</i> AMMD]                                                    |
| gj 115351727 | 56.3 | extracellular solute-binding protein, family 1 [ <i>B.ambifaria</i> AMMD]                               |
| gj 115350151 | 55.8 | F0F1 ATP synthase subunit alpha [ <i>B.ambifaria</i> AMMD]                                              |
| gj 134291078 | 55.7 | UspA domain protein [ <i>B.vietnamiensis</i> G4]                                                        |
| gj 115350882 | 55.4 | extracellular solute-binding protein, family 1 [ <i>B.ambifaria</i> AMMD]                               |
| gj 134295800 | 55.4 | OmpW family protein [ <i>B.vietnamiensis</i> G4]                                                        |
| gj 115352619 | 55.2 | cold-shock DNA-binding domain protein [ <i>B.ambifaria</i> AMMD]                                        |
| gj 115351011 | 54.8 | peptidase U62, modulator of DNA gyrase [ <i>B.ambifaria</i> AMMD]                                       |
| gj 115350969 | 54.5 | OmpA/MotB domain protein [ <i>B.ambifaria</i> AMMD]                                                     |
| gj 115350321 | 54.4 | 30S ribosomal protein S10 [ <i>B.ambifaria</i> AMMD]                                                    |
| gj 115351860 | 53.8 | 30S ribosomal protein S18 [ <i>B.ambifaria</i> AMMD]                                                    |
| gj 115350999 | 53.6 | 30S ribosomal protein S16 [ <i>B.ambifaria</i> AMMD]                                                    |
| gj 115350336 | 53.4 | 30S ribosomal protein S8 [ <i>B.ambifaria</i> AMMD]                                                     |
| gj 115350349 | 53.4 | 50S ribosomal protein L17 [ <i>B.ambifaria</i> AMMD]                                                    |
| gj 115350538 | 53.4 | 50S ribosomal protein L21 [ <i>B.ambifaria</i> AMMD]                                                    |
| gj 115352103 | 53.3 | 30S ribosomal protein S2 [ <i>B.ambifaria</i> AMMD]                                                     |
| gj 30314430  | 53.3 | outer membrane lipoprotein precursor [ <i>B.cepacia</i> ]                                               |
| gj 115350746 | 53   | protein of unknown function DUF883, ElaB [ <i>B.ambifaria</i> AMMD]                                     |
| gj 160222542 | 53   | 60 kDa chaperonin [ <i>B.cepacia</i> ]                                                                  |
| gj 115350154 | 52.5 | F0F1 ATP synthase subunit epsilon [ <i>B.ambifaria</i> AMMD]                                            |
| gj 115351778 | 52.4 | acetyl-CoA reductase [ <i>B.ambifaria</i> AMMD]                                                         |
| gj 115350971 | 52   | hypothetical protein Bamb_0917 [ <i>B.ambifaria</i> AMMD]                                               |
| gj 115359754 | 51.9 | UspA domain protein [ <i>B.ambifaria</i> AMMD]                                                          |
| gj 134291906 | 51.9 | GDP-mannose 4,6-dehydratase [ <i>B.vietnamiensis</i> G4]                                                |
| gj 115350122 | 51.7 | two component transcriptional regulator, winged helix family [ <i>B.ambifaria</i> AMMD]                 |
| gj 115352642 | 51.6 | Superoxide dismutase [ <i>B.ambifaria</i> AMMD]                                                         |
| gj 134291737 | 51.6 | periplasmic protein of unknown function, DUF1488 [ <i>B.vietnamiensis</i> G4]                           |
| gj 115350375 | 51.5 | protein of unknown function DUF1568 [ <i>B.ambifaria</i> AMMD]                                          |
| gj 115350610 | 51.4 | 2-dehydro-3-deoxyphosphogluconate aldolase/4-hydroxy-2-oxoglutarate aldolase [ <i>B.ambifaria</i> AMMD] |

|              |      |                                                                                                                  |
|--------------|------|------------------------------------------------------------------------------------------------------------------|
| gij115350627 | 51.4 | 50S ribosomal protein L13 [ <i>B.ambifaria</i> AMMD]                                                             |
| gij17863800  | 51.4 | ribosomal subunit S21 [ <i>B.cepacia</i> ]                                                                       |
| gij189348233 | 51.4 | putative molecular chaperone [ <i>B.multivorans</i> ATCC 17616]                                                  |
| gij115352960 | 50.9 | preprotein translocase subunit SecB [ <i>B.ambifaria</i> AMMD]                                                   |
| gij134291736 | 50.7 | heat shock protein Hsp20 [ <i>B.vietnamiensis</i> G4]                                                            |
| gij115351822 | 50.6 | 50S ribosomal protein L31 type B [ <i>B.ambifaria</i> AMMD]                                                      |
| gij115358067 | 50.6 | type II citrate synthase [ <i>B.ambifaria</i> AMMD]                                                              |
| gij115350346 | 50.4 | 30S ribosomal protein S11 [ <i>B.ambifaria</i> AMMD]                                                             |
| gij115350315 | 50.1 | DNA-directed RNA polymerase subunit beta' [ <i>B.ambifaria</i> AMMD]                                             |
| gij134290950 | 50   | histone family protein DNA-binding protein [ <i>B.vietnamiensis</i> G4]                                          |
| gij115350992 | 49.8 | electron transfer flavoprotein beta-subunit [ <i>B.ambifaria</i> AMMD]                                           |
| gij115352343 | 49.4 | 30S ribosomal protein S15 [ <i>B.ambifaria</i> AMMD]                                                             |
| gij134291889 | 49.4 | putative flagellar transcriptional activator FlhD [ <i>B.vietnamiensis</i> G4]                                   |
| gij134292901 | 49.2 | protein of unknown function DUF883, ElaB [ <i>B.vietnamiensis</i> G4]                                            |
| gij115350331 | 48.9 | 30S ribosomal protein S17 [ <i>B.ambifaria</i> AMMD]                                                             |
| gij115352237 | 48.8 | glutamine synthetase, type I [ <i>B.ambifaria</i> AMMD]                                                          |
| gij115350409 | 48.7 | twin argininte translocase protein A [ <i>B.ambifaria</i> AMMD]                                                  |
| gij115358065 | 48.5 | succinate dehydrogenase iron-sulfur subunit [ <i>B.ambifaria</i> AMMD]                                           |
| gij134291916 | 48.4 | NUDIX hydrolase [ <i>B.vietnamiensis</i> G4]                                                                     |
| gij134292837 | 48.4 | hypothetical protein Bcep1808_4128 [ <i>B.vietnamiensis</i> G4]                                                  |
| gij115358036 | 47.9 | 6-phosphogluconate dehydrogenase [ <i>B.ambifaria</i> AMMD]                                                      |
| gij115350391 | 47.6 | toluene tolerance family protein [ <i>B.ambifaria</i> AMMD]                                                      |
| gij115350335 | 47.5 | 30S ribosomal protein S14 [ <i>B.ambifaria</i> AMMD]                                                             |
| gij115352601 | 47.3 | 50S ribosomal protein L33 [ <i>B.ambifaria</i> AMMD]                                                             |
| gij115351783 | 47.1 | competence lipoprotein ComL [ <i>B.ambifaria</i> AMMD]                                                           |
| gij115351414 | 46.9 | 50S ribosomal protein L35 [ <i>B.ambifaria</i> AMMD]                                                             |
| gij115351804 | 46.8 | nucleoside diphosphate kinase [ <i>B.ambifaria</i> AMMD]                                                         |
| gij115350311 | 46.6 | 50S ribosomal protein L1 [ <i>B.ambifaria</i> AMMD]                                                              |
| gij115353188 | 46.4 | transcriptional regulators, TraR/DksA family [ <i>B.ambifaria</i> AMMD]                                          |
| gij115350347 | 46   | 30S ribosomal protein S4 [ <i>B.ambifaria</i> AMMD]                                                              |
| gij115352298 | 45.9 | uncharacterized protein probably involved in high-affinity Fe <sup>2+</sup> transport [ <i>B.ambifaria</i> AMMD] |
| gij115352627 | 45.7 | translation elongation factor G [ <i>B.ambifaria</i> AMMD]                                                       |
| gij115353180 | 45.6 | S-adenosylmethionine synthetase [ <i>B.ambifaria</i> AMMD]                                                       |
| gij115350310 | 45.5 | 50S ribosomal protein L11 [ <i>B.ambifaria</i> AMMD]                                                             |
| gij115352746 | 45.4 | succinyl-CoA synthetase subunit alpha [ <i>B.ambifaria</i> AMMD]                                                 |
| gij115350791 | 45.3 | hypothetical protein Bamb_0737 [ <i>B.ambifaria</i> AMMD]                                                        |
| gij115350421 | 45.1 | extracellular solute-binding protein, family 3 [ <i>B.ambifaria</i> AMMD]                                        |
| gij134294323 | 44.9 | histone family protein nucleoid-structuring protein H-NS [ <i>B.vietnamiensis</i> G4]                            |
| gij171318607 | 44.9 | histone family protein DNA-binding protein [ <i>B.ambifaria</i> MEX-5]                                           |
| gij134291716 | 44.8 | acetoacetyl-CoA reductase [ <i>B.vietnamiensis</i> G4]                                                           |
| gij115359110 | 44.6 | hypothetical protein Bamb_4362 [ <i>B.ambifaria</i> AMMD]                                                        |
| gij115351836 | 44.2 | ATPase AAA-2 domain protein [ <i>B.ambifaria</i> AMMD]                                                           |
| gij115352166 | 44   | Peptidylprolyl isomerase [ <i>B.ambifaria</i> AMMD]                                                              |
| gij115352101 | 43.9 | uridylate kinase [ <i>B.ambifaria</i> AMMD]                                                                      |
| gij115351818 | 43.8 | transcription termination factor Rho [ <i>B.ambifaria</i> AMMD]                                                  |
| gij154362145 | 43.6 | RNA polymerase beta subunit [ <i>B.cepacia</i> ]                                                                 |

|              |      |                                                                                               |
|--------------|------|-----------------------------------------------------------------------------------------------|
| gj 115351815 | 43.5 | hypothetical protein Bamb_1764 [ <i>B.ambifaria</i> AMMD]                                     |
| gj 115358620 | 43.5 | Alcohol dehydrogenase GroES domain protein [ <i>B.ambifaria</i> AMMD]                         |
| gj 115358813 | 43.3 | cold-shock DNA-binding domain protein [ <i>B.ambifaria</i> AMMD]                              |
| gj 115350309 | 43.2 | transcription antitermination protein NusG [ <i>B.ambifaria</i> AMMD]                         |
| gj 115351054 | 43   | acyl carrier protein [ <i>B.ambifaria</i> AMMD]                                               |
| gj 115351223 | 43   | transcription elongation factor GreA [ <i>B.ambifaria</i> AMMD]                               |
| gj 134294822 | 42.5 | GrpE protein [ <i>B.vietnamiensis</i> G4]                                                     |
| gj 115352167 | 42.3 | peptidyl-prolyl cis-trans isomerase, cyclophilin type [ <i>B.ambifaria</i> AMMD]              |
| gj 115352225 | 42.3 | pyruvate dehydrogenase subunit E1 [ <i>B.ambifaria</i> AMMD]                                  |
| gj 115350242 | 42.2 | S-adenosyl-L-homocysteine hydrolase [ <i>B.ambifaria</i> AMMD]                                |
| gj 115352973 | 42.2 | protein of unknown function DUF526 [ <i>B.ambifaria</i> AMMD]                                 |
| gj 86370994  | 42.2 | ribosomal S12 protein [ <i>B.cepacia</i> ]                                                    |
| gj 115352623 | 42.1 | isocitrate dehydrogenase [ <i>B.ambifaria</i> AMMD]                                           |
| gj 115350248 | 41.8 | Extracellular ligand-binding receptor [ <i>B.ambifaria</i> AMMD]                              |
| gj 134292338 | 41.5 | cationic amino acid ABC transporter, periplasmic binding protein [ <i>B.vietnamiensis</i> G4] |
| gj 115350160 | 41.4 | Extracellular ligand-binding receptor [ <i>B.ambifaria</i> AMMD]                              |
| gj 115352725 | 41.4 | pyruvate kinase [ <i>B.ambifaria</i> AMMD]                                                    |
| gj 115352647 | 40.9 | adenylate kinase [ <i>B.ambifaria</i> AMMD]                                                   |
| gj 115350628 | 40.8 | 30S ribosomal protein S9 [ <i>B.ambifaria</i> AMMD]                                           |
| gj 115350826 | 40.5 | Phosphomannomutase [ <i>B.ambifaria</i> AMMD]                                                 |
| gj 115350747 | 40.1 | Peroxidase [ <i>B.ambifaria</i> AMMD]                                                         |
| gj 115351961 | 40   | ATP-dependent protease ATP-binding subunit [ <i>B.ambifaria</i> AMMD]                         |
| gj 115352102 | 39.9 | elongation factor Ts [ <i>B.ambifaria</i> AMMD]                                               |
| gj 115352900 | 39.8 | OstA family protein [ <i>B.ambifaria</i> AMMD]                                                |
| gj 134291717 | 39.8 | hypothetical protein Bcep1808_6331 [ <i>B.vietnamiensis</i> G4]                               |
| gj 115352171 | 39.7 | inositol monophosphatase [ <i>B.ambifaria</i> AMMD]                                           |
| gj 115350557 | 39.5 | Redoxin domain protein [ <i>B.ambifaria</i> AMMD]                                             |
| gj 115352342 | 39.2 | polynucleotide phosphorylase/polyadenylase [ <i>B.ambifaria</i> AMMD]                         |
| gj 115350314 | 39.1 | DNA-directed RNA polymerase subunit beta [ <i>B.ambifaria</i> AMMD]                           |
| gj 115359727 | 39.1 | 3-hydroxybutyrate dehydrogenase [ <i>B.ambifaria</i> AMMD]                                    |
| gj 115350709 | 39   | phosphoribosylaminoimidazole synthetase [ <i>B.ambifaria</i> AMMD]                            |
| gj 115350408 | 38.8 | histidine triad (HIT) protein [ <i>B.ambifaria</i> AMMD]                                      |
| gj 115350503 | 38.8 | enoyl-CoA hydratase [ <i>B.ambifaria</i> AMMD]                                                |
| gj 134291721 | 38.6 | UspA domain protein [ <i>B.vietnamiensis</i> G4]                                              |
| gj 115350885 | 38.5 | ABC transporter related [ <i>B.ambifaria</i> AMMD]                                            |
| gj 115352113 | 38.5 | 2,3,4,5-tetrahydropyridine-2-carboxylate N-succinyltransferase [ <i>B.ambifaria</i> AMMD]     |
| gj 115351392 | 38.4 | putative transcriptional regulator, XRE family [ <i>B.ambifaria</i> AMMD]                     |
| gj 115359179 | 38.4 | Extracellular ligand-binding receptor [ <i>B.ambifaria</i> AMMD]                              |
| gj 115351980 | 38.3 | Carboxymuconolactone decarboxylase [ <i>B.ambifaria</i> AMMD]                                 |
| gj 134295827 | 38   | protein of unknown function DUF465 [ <i>B.vietnamiensis</i> G4]                               |
| gj 115358580 | 37.8 | Succinate-semialdehyde dehydrogenase (NAD(P)(+)) [ <i>B.ambifaria</i> AMMD]                   |
| gj 134295935 | 37.8 | hypothetical protein Bcep1808_1832 [ <i>B.vietnamiensis</i> G4]                               |
| gj 134296969 | 37.8 | phasin family protein [ <i>B.vietnamiensis</i> G4]                                            |
| gj 115351002 | 37.7 | 50S ribosomal protein L19 [ <i>B.ambifaria</i> AMMD]                                          |

|              |      |                                                                                             |
|--------------|------|---------------------------------------------------------------------------------------------|
| gj 115350843 | 37.6 | protein-L-isoaspartate(D-aspartate) O-methyltransferase [ <i>B.ambifaria</i> AMMD]          |
| gj 115350231 | 37.4 | response regulator receiver protein [ <i>B.ambifaria</i> AMMD]                              |
| gj 115352827 | 37.3 | aspartyl-tRNA synthetase [ <i>B.ambifaria</i> AMMD]                                         |
| gj 116689141 | 37.3 | 50S ribosomal protein L32 [ <i>B.cenocepacia</i> HI2424]                                    |
| gj 115350325 | 37.1 | 50S ribosomal protein L2 [ <i>B.ambifaria</i> AMMD]                                         |
| gj 115351507 | 37.1 | extracellular solute-binding protein, family 3 [ <i>B.ambifaria</i> AMMD]                   |
| gj 115352100 | 37.1 | ribosome recycling factor [ <i>B.ambifaria</i> AMMD]                                        |
| gj 115350369 | 36.9 | glycerol-3-phosphate transporter periplasmic binding protein [ <i>B.ambifaria</i> AMMD]     |
| gj 115350436 | 36.7 | protein of unknown function DUF877 [ <i>B.ambifaria</i> AMMD]                               |
| gj 115351732 | 36.7 | OmpW family protein [ <i>B.ambifaria</i> AMMD]                                              |
| gj 134291907 | 36.6 | exopolysaccharide transport protein family [ <i>B.vietnamiensis</i> G4]                     |
| gj 115350698 | 36.5 | GrpE protein [ <i>B.ambifaria</i> AMMD]                                                     |
| gj 134294235 | 36.3 | F0F1 ATP synthase subunit delta [ <i>B.vietnamiensis</i> G4]                                |
| gj 134291169 | 36.1 | histone family protein nucleoid-structuring protein H-NS [ <i>B.vietnamiensis</i> G4]       |
| gj 115351230 | 35.8 | phosphate ABC transporter, periplasmic phosphate-binding protein [ <i>B.ambifaria</i> AMMD] |
| gj 115352723 | 35.8 | phosphoribosylaminoimidazole-succinocarboxamide synthase [ <i>B.ambifaria</i> AMMD]         |
| gj 115350115 | 35.6 | uncharacterized enzyme [ <i>B.ambifaria</i> AMMD]                                           |
| gj 115351436 | 35.6 | ribosome-binding factor A [ <i>B.ambifaria</i> AMMD]                                        |
| gj 115352336 | 35.5 | NADH dehydrogenase subunit C [ <i>B.ambifaria</i> AMMD]                                     |
| gj 134296638 | 35.3 | hypothetical protein Bcep1808_2540 [ <i>B.vietnamiensis</i> G4]                             |
| gj 115353149 | 35.2 | Ferredoxin--NADP(+) reductase [ <i>B.ambifaria</i> AMMD]                                    |
| gj 115351550 | 35.1 | sulfate ABC transporter, periplasmic sulfate-binding protein [ <i>B.ambifaria</i> AMMD]     |
| gj 115350340 | 35   | 50S ribosomal protein L30 [ <i>B.ambifaria</i> AMMD]                                        |
| gj 115350434 | 34.9 | Tetratricopeptide TPR_2 repeat protein [ <i>B.ambifaria</i> AMMD]                           |
| gj 115353194 | 34.9 | acetylglutamate kinase [ <i>B.ambifaria</i> AMMD]                                           |
| gj 115352513 | 34.8 | inorganic pyrophosphatase [ <i>B.ambifaria</i> AMMD]                                        |
| gj 134292692 | 34.7 | LemA family protein [ <i>B.vietnamiensis</i> G4]                                            |
| gj 115353018 | 34.6 | hypothetical protein Bamb_2967 [ <i>B.ambifaria</i> AMMD]                                   |
| gj 115353216 | 34.6 | cell shape determining protein, MreB/Mrl family [ <i>B.ambifaria</i> AMMD]                  |
| gj 134291891 | 34.4 | UTP-glucose-1-phosphate uridylyltransferase GalU [ <i>B.vietnamiensis</i> G4]               |
| gj 134294783 | 34.4 | protein of unknown function DUF330 [ <i>B.vietnamiensis</i> G4]                             |
| gj 115352094 | 34.3 | outer membrane chaperone Skp (OmpH) [ <i>B.ambifaria</i> AMMD]                              |
| gj 115350983 | 34.2 | ADP-L-glycero-D-manno-heptose-6-epimerase [ <i>B.ambifaria</i> AMMD]                        |
| gj 115351435 | 34.2 | translation initiation factor IF-2 [ <i>B.ambifaria</i> AMMD]                               |
| gj 115350835 | 34   | urease subunit gamma [ <i>B.ambifaria</i> AMMD]                                             |
| gj 115350313 | 33.9 | 50S ribosomal protein L7/L12 [ <i>B.ambifaria</i> AMMD]                                     |
| gj 134296812 | 33.9 | RND efflux system, outer membrane lipoprotein, NodT family [ <i>B.vietnamiensis</i> G4]     |
| gj 115352888 | 33.7 | single-strand DNA-binding protein [ <i>B.ambifaria</i> AMMD]                                |
| gj 115351443 | 33.6 | alpha-ketoglutarate decarboxylase [ <i>B.ambifaria</i> AMMD]                                |
| gj 134292631 | 33.6 | hypothetical protein Bcep1808_3921 [ <i>B.vietnamiensis</i> G4]                             |
| gj 6683465   | 33.5 | DsbA [ <i>B.cepacia</i> ]                                                                   |

|              |      |                                                                                 |
|--------------|------|---------------------------------------------------------------------------------|
| gj 115350058 | 33.2 | DNA polymerase III subunit beta [ <i>B.ambifaria</i> AMMD]                      |
| gj 115358095 | 33.2 | aspartate-semialdehyde dehydrogenase [ <i>B.ambifaria</i> AMMD]                 |
| gj 115358056 | 33   | aconitate hydratase [ <i>B.ambifaria</i> AMMD]                                  |
| gj 115350291 | 32.9 | orotate phosphoribosyltransferase [ <i>B.ambifaria</i> AMMD]                    |
| gj 115359093 | 32.9 | Lysine decarboxylase [ <i>B.ambifaria</i> AMMD]                                 |
| gj 115350919 | 32.8 | cold-shock DNA-binding domain protein [ <i>B.ambifaria</i> AMMD]                |
| gj 115351415 | 32.8 | 50S ribosomal protein L20 [ <i>B.ambifaria</i> AMMD]                            |
| gj 115358650 | 32.8 | cold-shock DNA-binding domain protein [ <i>B.ambifaria</i> AMMD]                |
| gj 134293121 | 32.8 | Glutathione S-transferase, C-terminal domain [ <i>B.vietnamiensis</i> G4]       |
| gj 115350879 | 32.7 | glucokinase [ <i>B.ambifaria</i> AMMD]                                          |
| gj 115351413 | 32.7 | translation initiation factor IF-3 [ <i>B.ambifaria</i> AMMD]                   |
| gj 115351962 | 32.7 | ATP-dependent Clp protease proteolytic subunit [ <i>B.ambifaria</i> AMMD]       |
| gj 115360688 | 32.7 | cyanate hydratase [ <i>B.ambifaria</i> AMMD]                                    |
| gj 134293177 | 32.6 | porin, Gram-negative type [ <i>B.vietnamiensis</i> G4]                          |
| gj 115352084 | 32.5 | band 7 protein [ <i>B.ambifaria</i> AMMD]                                       |
| gj 134291603 | 32.5 | transport-associated [ <i>B.vietnamiensis</i> G4]                               |
| gj 115352964 | 32.4 | carboxyl-terminal protease [ <i>B.ambifaria</i> AMMD]                           |
| gj 115352992 | 32.4 | hypothetical protein Bamb_2941 [ <i>B.ambifaria</i> AMMD]                       |
| gj 134294034 | 32.3 | phosphate acetyltransferase [ <i>B.vietnamiensis</i> G4]                        |
| gj 115352914 | 32.2 | 50S ribosomal protein L25/general stress protein Ctc [ <i>B.ambifaria</i> AMMD] |
| gj 134293484 | 32.2 | hypothetical protein Bcep1808_4798 [ <i>B.vietnamiensis</i> G4]                 |
| gj 134295918 | 32.2 | Ankyrin [ <i>B.vietnamiensis</i> G4]                                            |
| gj 115359728 | 32.1 | acetoacetate decarboxylase [ <i>B.ambifaria</i> AMMD]                           |
| gj 134293320 | 32.1 | TonB-dependent siderophore receptor [ <i>B.vietnamiensis</i> G4]                |
| gj 134296609 | 32   | Methyltransferase type 11 [ <i>B.vietnamiensis</i> G4]                          |
| gj 115351851 | 31.7 | hypothetical protein Bamb_1800 [ <i>B.ambifaria</i> AMMD]                       |
| gj 134294434 | 31.7 | ribosomal protein L7/L12 [ <i>B.vietnamiensis</i> G4]                           |
| gj 134291734 | 31.5 | transport-associated [ <i>B.vietnamiensis</i> G4]                               |
| gj 134291909 | 31.5 | polysaccharide export protein [ <i>B.vietnamiensis</i> G4]                      |
| gj 134297154 | 31.5 | hypothetical protein Bcep1808_3063 [ <i>B.vietnamiensis</i> G4]                 |
| gj 10121186  | 31.4 | RecA [ <i>B.cepacia</i> ]                                                       |
| gj 115350890 | 31.4 | outer-membrane lipoprotein carrier protein [ <i>B.ambifaria</i> AMMD]           |
| gj 115352086 | 31.3 | phosphoenolpyruvate synthase [ <i>B.ambifaria</i> AMMD]                         |
| gj 134292620 | 31.3 | hypothetical protein Bcep1808_3910 [ <i>B.vietnamiensis</i> G4]                 |
| gj 115350281 | 31.1 | 6-phosphogluconate dehydrogenase, NAD-binding [ <i>B.ambifaria</i> AMMD]        |
| gj 115352227 | 31.1 | two component transcriptional regulator, LuxR family [ <i>B.ambifaria</i> AMMD] |
| gj 115352334 | 31.1 | NADH dehydrogenase subunit E [ <i>B.ambifaria</i> AMMD]                         |
| gj 115352910 | 31   | Tetratricopeptide TPR_2 repeat protein [ <i>B.ambifaria</i> AMMD]               |
| gj 116693782 | 31   | NADPH-dependent FMN reductase [ <i>B.cenocepacia</i> HI2424]                    |
| gj 115350913 | 30.8 | guanylate kinase [ <i>B.ambifaria</i> AMMD]                                     |
| gj 115352521 | 30.8 | Methyltransferase type 11 [ <i>B.ambifaria</i> AMMD]                            |
| gj 115351859 | 30.7 | 50S ribosomal protein L9 [ <i>B.ambifaria</i> AMMD]                             |
| gj 115350888 | 30.6 | thioredoxin reductase [ <i>B.ambifaria</i> AMMD]                                |
| gj 115351373 | 30.6 | UTP-glucose-1-phosphate uridylyltransferase [ <i>B.ambifaria</i> AMMD]          |

|              |      |                                                                                       |
|--------------|------|---------------------------------------------------------------------------------------|
| gi 134294857 | 30.6 | hypothetical protein Bcep1808_0745 [ <i>B.vietnamiensis</i> G4]                       |
| gi 115352507 | 30.4 | nitrogen regulatory protein P-II [ <i>B.ambifaria</i> AMMD]                           |
| gi 115351052 | 30.3 | malonyl CoA-acyl carrier protein transacylase [ <i>B.ambifaria</i> AMMD]              |
| gi 115352425 | 30.3 | transaldolase B [ <i>B.ambifaria</i> AMMD]                                            |
| gi 134291714 | 30.3 | Alcohol dehydrogenase GroES domain protein [ <i>B.vietnamiensis</i> G4]               |
| gi 134293948 | 30.1 | putative signal-transduction protein with CBS domains [ <i>B.vietnamiensis</i> G4]    |
| gi 115352875 | 30   | acetyl-CoA acetyltransferase [ <i>B.ambifaria</i> AMMD]                               |
| gi 115350731 | 29.9 | translocation protein TolB [ <i>B.ambifaria</i> AMMD]                                 |
| gi 115358101 | 29.8 | tryptophan synthase subunit alpha [ <i>B.ambifaria</i> AMMD]                          |
| gi 115351987 | 29.6 | phage shock protein A, PspA [ <i>B.ambifaria</i> AMMD]                                |
| gi 115352813 | 29.6 | PpiC-type peptidyl-prolyl cis-trans isomerase [ <i>B.ambifaria</i> AMMD]              |
| gi 115352941 | 29.5 | lipoprotein, YaeC family [ <i>B.ambifaria</i> AMMD]                                   |
| gi 115352412 | 29.4 | 3-carboxymuconate cyclase-like protein [ <i>B.ambifaria</i> AMMD]                     |
| gi 134291894 | 29.4 | UDP-glucose 6-dehydrogenase [ <i>B.vietnamiensis</i> G4]                              |
| gi 134291974 | 29.4 | histone family protein nucleoid-structuring protein H-NS [ <i>B.vietnamiensis</i> G4] |
| gi 115350729 | 29.3 | hypothetical protein Bamb_0675 [ <i>B.ambifaria</i> AMMD]                             |
| gi 115351053 | 29.3 | 3-ketoacyl-(acyl-carrier-protein) reductase [ <i>B.ambifaria</i> AMMD]                |
| gi 134291872 | 29.3 | extracellular solute-binding protein, family 3 [ <i>B.vietnamiensis</i> G4]           |
| gi 115350435 | 29.2 | Uncharacterised conserved protein UCP028301 [ <i>B.ambifaria</i> AMMD]                |
| gi 134296814 | 29.2 | efflux transporter, RND family, MFP subunit [ <i>B.vietnamiensis</i> G4]              |
| gi 189352142 | 29.2 | conserved hypothetical protein [ <i>B.multivorans</i> ATCC 17616]                     |
| gi 115350581 | 29.1 | orotidine 5'-phosphate decarboxylase [ <i>B.ambifaria</i> AMMD]                       |
| gi 134294993 | 28.8 | 6-phosphogluconolactonase [ <i>B.vietnamiensis</i> G4]                                |
| gi 115350317 | 28.6 | 30S ribosomal protein S12 [ <i>B.ambifaria</i> AMMD]                                  |
| gi 115351857 | 28.4 | protein of unknown function DUF47 [ <i>B.ambifaria</i> AMMD]                          |
| gi 115351878 | 28.4 | Ankyrin [ <i>B.ambifaria</i> AMMD]                                                    |
| gi 134294955 | 28.4 | protein-L-isoaspartate(D-aspartate) O-methyltransferase [ <i>B.vietnamiensis</i> G4]  |
| gi 134297078 | 28.4 | hypothetical protein Bcep1808_2987 [ <i>B.vietnamiensis</i> G4]                       |
| gi 115350521 | 28.3 | cell division protein FtsA [ <i>B.ambifaria</i> AMMD]                                 |
| gi 115350551 | 28.3 | ribonucleotide-diphosphate reductase subunit alpha [ <i>B.ambifaria</i> AMMD]         |
| gi 115353191 | 28.3 | response regulator receiver protein [ <i>B.ambifaria</i> AMMD]                        |
| gi 134291328 | 28.3 | Carbonate dehydratase [ <i>B.vietnamiensis</i> G4]                                    |
| gi 115350466 | 28.2 | glutaredoxin-like protein [ <i>B.ambifaria</i> AMMD]                                  |
| gi 115350881 | 28.2 | glucose-6-phosphate 1-dehydrogenase [ <i>B.ambifaria</i> AMMD]                        |
| gi 115351445 | 28.2 | dihydrolipoamide dehydrogenase [ <i>B.ambifaria</i> AMMD]                             |
| gi 115353176 | 28.2 | aldo/keto reductase [ <i>B.ambifaria</i> AMMD]                                        |
| gi 115352726 | 28.1 | phosphoglycerate kinase [ <i>B.ambifaria</i> AMMD]                                    |
| gi 134294572 | 28.1 | Uncharacterised conserved protein UCP028301 [ <i>B.vietnamiensis</i> G4]              |
| gi 134295564 | 28.1 | hypothetical protein Bcep1808_1456 [ <i>B.vietnamiensis</i> G4]                       |
| gi 115351842 | 28   | threonine synthase [ <i>B.ambifaria</i> AMMD]                                         |
| gi 115352724 | 28   | fructose-1,6-bisphosphate aldolase [ <i>B.ambifaria</i> AMMD]                         |
| gi 134291688 | 28   | hypothetical protein Bcep1808_6302 [ <i>B.vietnamiensis</i> G4]                       |

|              |      |                                                                                                |
|--------------|------|------------------------------------------------------------------------------------------------|
| gj 134296939 | 28   | intracellular protease, Pfpl family [ <i>B.vietnamiensis</i> G4]                               |
| gj 115350150 | 27.9 | F0F1 ATP synthase subunit delta [ <i>B.ambifaria</i> AMMD]                                     |
| gj 115350592 | 27.8 | transketolase [ <i>B.ambifaria</i> AMMD]                                                       |
| gj 115352300 | 27.8 | aromatic amino acid aminotransferase [ <i>B.ambifaria</i> AMMD]                                |
| gj 116689828 | 27.8 | RNA-binding protein Hfq [ <i>B.cenocepacia</i> HI2424]                                         |
| gj 115352197 | 27.7 | CTP synthetase [ <i>B.ambifaria</i> AMMD]                                                      |
| gj 115352574 | 27.7 | Uncharacterised conserved protein UCP030820 [ <i>B.ambifaria</i> AMMD]                         |
| gj 115359720 | 27.7 | protein of unknown function DUF1348 [ <i>B.ambifaria</i> AMMD]                                 |
| gj 83721283  | 27.5 | thiol peroxidase [ <i>B.thailandensis</i> E264]                                                |
| gj 115352284 | 27.4 | hydro-lyases, Fe-S type, tartrate/fumarate subfamily, alpha subunit [ <i>B.ambifaria</i> AMMD] |
| gj 134294352 | 27.4 | Carboxymethylenebutenolidase [ <i>B.vietnamiensis</i> G4]                                      |
| gj 134296286 | 27.4 | hypothetical protein Bcep1808_2184 [ <i>B.vietnamiensis</i> G4]                                |
| gj 5924062   | 27.4 | unknown [ <i>B.cepacia</i> ]                                                                   |
| gj 115351960 | 27.3 | ATP-dependent protease La [ <i>B.ambifaria</i> AMMD]                                           |
| gj 134292900 | 27.3 | hypothetical protein Bcep1808_4191 [ <i>B.vietnamiensis</i> G4]                                |
| gj 134296935 | 27.3 | Endoribonuclease L-PSP [ <i>B.vietnamiensis</i> G4]                                            |
| gj 115350152 | 27.1 | F0F1 ATP synthase subunit gamma [ <i>B.ambifaria</i> AMMD]                                     |
| gj 115350912 | 27   | hypothetical protein Bamb_0858 [ <i>B.ambifaria</i> AMMD]                                      |
| gj 115353213 | 26.9 | aspartyl/glutamyl-tRNA amidotransferase subunit B [ <i>B.ambifaria</i> AMMD]                   |
| gj 115351367 | 26.7 | SirA family protein [ <i>B.ambifaria</i> AMMD]                                                 |
| gj 115352651 | 26.7 | 30S ribosomal protein S20 [ <i>B.ambifaria</i> AMMD]                                           |
| gj 134296410 | 26.6 | glutathione S-transferase-like protein [ <i>B.vietnamiensis</i> G4]                            |
| gj 115352384 | 26.5 | phosphoribosylamine--glycine ligase [ <i>B.ambifaria</i> AMMD]                                 |
| gj 134291888 | 26.5 | hypothetical protein Bcep1808_6505 [ <i>B.vietnamiensis</i> G4]                                |
| gj 134293081 | 26.5 | peptidase M23B [ <i>B.vietnamiensis</i> G4]                                                    |
| gj 115350599 | 26.4 | SmpA/OmlA domain protein [ <i>B.ambifaria</i> AMMD]                                            |
| gj 115352705 | 26.4 | RND efflux system, outer membrane lipoprotein, NodT family [ <i>B.ambifaria</i> AMMD]          |
| gj 116688835 | 26.4 | Peroxidase [ <i>B.cenocepacia</i> HI2424]                                                      |
| gj 115350686 | 26   | peptidase U62, modulator of DNA gyrase [ <i>B.ambifaria</i> AMMD]                              |
| gj 115350522 | 25.9 | cell division protein FtsZ [ <i>B.ambifaria</i> AMMD]                                          |
| gj 134296575 | 25.9 | ecotin precursor [ <i>B.vietnamiensis</i> G4]                                                  |
| gj 115352335 | 25.7 | NADH dehydrogenase subunit D [ <i>B.ambifaria</i> AMMD]                                        |
| gj 134291738 | 25.6 | UspA domain protein [ <i>B.vietnamiensis</i> G4]                                               |
| gj 134291105 | 25.5 | Linocin_M18 bacteriocin protein [ <i>B.vietnamiensis</i> G4]                                   |
| gj 134293786 | 25.5 | hypothetical protein Bcep1808_5106 [ <i>B.vietnamiensis</i> G4]                                |
| gj 115350993 | 25.4 | electron transfer flavoprotein, alpha subunit [ <i>B.ambifaria</i> AMMD]                       |
| gj 115352729 | 25.4 | branched-chain amino acid aminotransferase [ <i>B.ambifaria</i> AMMD]                          |
| gj 116690382 | 25.4 | hypothetical protein Bcen2424_2362 [ <i>B.cenocepacia</i> HI2424]                              |
| gj 134295952 | 25.4 | Glucose-6-phosphate isomerase [ <i>B.vietnamiensis</i> G4]                                     |
| gj 134297253 | 25.4 | aldo/keto reductase [ <i>B.vietnamiensis</i> G4]                                               |
| gj 115352075 | 25.3 | inositol-5-monophosphate dehydrogenase [ <i>B.ambifaria</i> AMMD]                              |
| gj 134292463 | 25.2 | UspA domain protein [ <i>B.vietnamiensis</i> G4]                                               |
| gj 134294333 | 25.2 | methyl-accepting chemotaxis sensory transducer [ <i>B.vietnamiensis</i> G4]                    |
| gj 115350385 | 25.1 | thiazole synthase [ <i>B.ambifaria</i> AMMD]                                                   |



|              |      |                                                                                                                      |
|--------------|------|----------------------------------------------------------------------------------------------------------------------|
| gij134297084 | 25.1 | ABC-type uncharacterized transport system auxiliary component-like protein [ <i>B.vietnamiensis</i> G4]              |
| gij189349329 | 25.1 | peroxiredoxin [ <i>B.multivorans</i> ATCC 17616]                                                                     |
| gij91784510  | 25   | hypothetical protein Bxe_A1289 [ <i>B.xenovorans</i> LB400]                                                          |
| gij115351227 | 24.9 | ATP-dependent metalloprotease FtsH [ <i>B.ambifaria</i> AMMD]                                                        |
| gij115351791 | 24.9 | ATP phosphoribosyltransferase regulatory subunit [ <i>B.ambifaria</i> AMMD]                                          |
| gij115350555 | 24.8 | 17 kDa surface antigen [ <i>B.ambifaria</i> AMMD]                                                                    |
| gij115351854 | 24.8 | PhoH family protein [ <i>B.ambifaria</i> AMMD]                                                                       |
| gij134294984 | 24.8 | transcription antitermination protein NusB [ <i>B.vietnamiensis</i> G4]                                              |
| gij115352530 | 24.6 | Lysine decarboxylase [ <i>B.ambifaria</i> AMMD]                                                                      |
| gij115351055 | 24.5 | 3-oxoacyl-(acyl carrier protein) synthase II [ <i>B.ambifaria</i> AMMD]                                              |
| gij116691095 | 24.5 | aldo/keto reductase [ <i>B.cenocepacia</i> HI2424]                                                                   |
| gij115350609 | 24.4 | phosphogluconate dehydratase [ <i>B.ambifaria</i> AMMD]                                                              |
| gij115351799 | 24.4 | hypothetical protein Bamb_1748 [ <i>B.ambifaria</i> AMMD]                                                            |
| gij115352177 | 24.4 | FKBP-type peptidyl-prolyl cis-trans isomerases 2-like protein [ <i>B.ambifaria</i> AMMD]                             |
| gij134291678 | 24.4 | UspA domain protein [ <i>B.vietnamiensis</i> G4]                                                                     |
| gij115352707 | 24.3 | efflux transporter, RND family, MFP subunit [ <i>B.ambifaria</i> AMMD]                                               |
| gij134291905 | 24.1 | NAD-dependent epimerase/dehydratase [ <i>B.vietnamiensis</i> G4]                                                     |
| gij115351210 | 23.9 | glutathione S-transferase-like protein [ <i>B.ambifaria</i> AMMD]                                                    |
| gij115351476 | 23.9 | periplasmic binding protein/LacI transcriptional regulator [ <i>B.ambifaria</i> AMMD]                                |
| gij115360302 | 23.9 | Peptidylprolyl isomerase [ <i>B.ambifaria</i> AMMD]                                                                  |
| gij134292090 | 23.9 | Extracellular ligand-binding receptor [ <i>B.vietnamiensis</i> G4]                                                   |
| gij134294458 | 23.9 | 50S ribosomal protein L6 [ <i>B.vietnamiensis</i> G4]                                                                |
| gij115350638 | 23.8 | bifunctional phosphoribosylaminoimidazolecarboxamide formyltransferase/IMP cyclohydrolase [ <i>B.ambifaria</i> AMMD] |
| gij134297229 | 23.8 | Ferredoxin--NADP(+) reductase [ <i>B.vietnamiensis</i> G4]                                                           |
| gij115360206 | 23.7 | cationic amino acid ABC transporter, periplasmic binding protein [ <i>B.ambifaria</i> AMMD]                          |
| gij134292525 | 23.7 | toluene tolerance family protein [ <i>B.vietnamiensis</i> G4]                                                        |
| gij115351951 | 23.5 | PpiC-type peptidyl-prolyl cis-trans isomerase [ <i>B.ambifaria</i> AMMD]                                             |
| gij115352497 | 23.5 | two component transcriptional regulator, winged helix family [ <i>B.ambifaria</i> AMMD]                              |
| gij134295694 | 23.5 | lysine/ornithine N-monooxygenase [ <i>B.vietnamiensis</i> G4]                                                        |
| gij134295697 | 23.5 | hypothetical protein Bcep1808_1590 [ <i>B.vietnamiensis</i> G4]                                                      |
| gij115350292 | 23.4 | malic enzyme [ <i>B.ambifaria</i> AMMD]                                                                              |
| gij115350615 | 23.4 | adenylosuccinate lyase [ <i>B.ambifaria</i> AMMD]                                                                    |
| gij115353023 | 23.2 | extracellular solute-binding protein, family 5 [ <i>B.ambifaria</i> AMMD]                                            |
| gij134296537 | 23.2 | putative transcriptional regulator, GntR family [ <i>B.vietnamiensis</i> G4]                                         |
| gij158702462 | 23.2 | ferric uptake regulator [ <i>B.cepacia</i> ]                                                                         |
| gij4128212   | 23.2 | principal sigma factor [ <i>B.cepacia</i> ]                                                                          |
| gij134290916 | 23.1 | hypothetical protein Bcep1808_5486 [ <i>B.vietnamiensis</i> G4]                                                      |
| gij134294994 | 23.1 | glucose-6-phosphate 1-dehydrogenase [ <i>B.vietnamiensis</i> G4]                                                     |
| gij115351977 | 23   | osmolarity response regulator [ <i>B.ambifaria</i> AMMD]                                                             |
| gij115352229 | 23   | Oligopeptidase A [ <i>B.ambifaria</i> AMMD]                                                                          |
| gij115352732 | 23   | hypothetical protein Bamb_2681 [ <i>B.ambifaria</i> AMMD]                                                            |
| gij115358716 | 23   | transcriptional regulator, MarR family [ <i>B.ambifaria</i> AMMD]                                                    |

|              |      |                                                                                                                 |
|--------------|------|-----------------------------------------------------------------------------------------------------------------|
| gj 115352858 | 22.9 | peptidase M48, Ste24p [ <i>B.ambifaria</i> AMMD]                                                                |
| gj 134294595 | 22.9 | nitroreductase [ <i>B.vietnamiensis</i> G4]                                                                     |
| gj 115351801 | 22.8 | 4-hydroxy-3-methylbut-2-en-1-yl diphosphate synthase [ <i>B.ambifaria</i> AMMD]                                 |
| gj 134294574 | 22.8 | protein of unknown function DUF796 [ <i>B.vietnamiensis</i> G4]                                                 |
| gj 134294801 | 22.8 | Ferritin, Dps family protein [ <i>B.vietnamiensis</i> G4]                                                       |
| gj 115352840 | 22.7 | Endoribonuclease L-PSP [ <i>B.ambifaria</i> AMMD]                                                               |
| gj 134294246 | 22.7 | Extracellular ligand-binding receptor [ <i>B.vietnamiensis</i> G4]                                              |
| gj 134295774 | 22.7 | hypothetical protein Bcep1808_1670 [ <i>B.vietnamiensis</i> G4]                                                 |
| gj 134297166 | 22.7 | Heavy metal transport/detoxification protein [ <i>B.vietnamiensis</i> G4]                                       |
| gj 115359854 | 22.6 | hypothetical protein Bamb_5109 [ <i>B.ambifaria</i> AMMD]                                                       |
| gj 115361014 | 22.5 | extracellular solute-binding protein, family 3 [ <i>B.ambifaria</i> AMMD]                                       |
| gj 115361244 | 22.5 | dihydrolipoamide dehydrogenase [ <i>B.ambifaria</i> AMMD]                                                       |
| gj 134296385 | 22.5 | Biopolymer transport protein ExbD/TolR [ <i>B.vietnamiensis</i> G4]                                             |
| gj 115352520 | 22.4 | phosphoenolpyruvate carboxylase [ <i>B.ambifaria</i> AMMD]                                                      |
| gj 115352654 | 22.4 | nucleotide-binding protein [ <i>B.ambifaria</i> AMMD]                                                           |
| gj 115359687 | 22.4 | malate synthase G [ <i>B.ambifaria</i> AMMD]                                                                    |
| gj 134295686 | 22.4 | Taurine catabolism dioxygenase TauD/TfdA [ <i>B.vietnamiensis</i> G4]                                           |
| gj 115352160 | 22.3 | aspartate kinase [ <i>B.ambifaria</i> AMMD]                                                                     |
| gj 115358623 | 22.3 | alpha,alpha-trehalose-phosphate synthase (UDP-forming) [ <i>B.ambifaria</i> AMMD]                               |
| gj 116688622 | 22.3 | 17 kDa surface antigen [ <i>B.cenocepacia</i> HI2424]                                                           |
| gj 115352353 | 22.1 | acetolactate synthase 3 regulatory subunit [ <i>B.ambifaria</i> AMMD]                                           |
| gj 134295693 | 22.1 | amino acid adenylation domain [ <i>B.vietnamiensis</i> G4]                                                      |
| gj 115352617 | 21.9 | ATP-dependent Clp protease, ATP-binding subunit clpA [ <i>B.ambifaria</i> AMMD]                                 |
| gj 115353103 | 21.9 | porin, Gram-negative type [ <i>B.ambifaria</i> AMMD]                                                            |
| gj 115350841 | 21.8 | ABC branched chain amino acid family transporter, periplasmic ligand binding protein [ <i>B.ambifaria</i> AMMD] |
| gj 115350876 | 21.8 | glutamate-1-semialdehyde 2,1-aminomutase [ <i>B.ambifaria</i> AMMD]                                             |
| gj 116688363 | 21.8 | 50S ribosomal protein L7/L12 [ <i>B.cenocepacia</i> HI2424]                                                     |
| gj 189349441 | 21.8 | putative exported protein [ <i>B.multivorans</i> ATCC 17616]                                                    |
| gj 134291690 | 21.7 | hypothetical protein Bcep1808_6304 [ <i>B.vietnamiensis</i> G4]                                                 |
| gj 115350612 | 21.6 | carbohydrate kinase, thermoresistant glucokinase family [ <i>B.ambifaria</i> AMMD]                              |
| gj 115351121 | 21.6 | extracellular solute-binding protein, family 3 [ <i>B.ambifaria</i> AMMD]                                       |
| gj 2738611   | 21.6 | L-ornithine N(5)-oxygenase [ <i>B.cepacia</i> ]                                                                 |
| gj 83719093  | 21.6 | co-chaperonin GroES [ <i>B.thailandensis</i> E264]                                                              |
| gj 115351594 | 21.5 | TonB-dependent siderophore receptor [ <i>B.ambifaria</i> AMMD]                                                  |
| gj 134292402 | 21.4 | histone family protein nucleoid-structuring protein H-NS [ <i>B.vietnamiensis</i> G4]                           |
| gj 134295219 | 21.3 | alkyl hydroperoxide reductase/ Thiol specific antioxidant/ Mal allergen [ <i>B.vietnamiensis</i> G4]            |
| gj 115352622 | 21.2 | isocitrate dehydrogenase, NADP-dependent [ <i>B.ambifaria</i> AMMD]                                             |
| gj 134295947 | 21.2 | PpiC-type peptidyl-prolyl cis-trans isomerase [ <i>B.vietnamiensis</i> G4]                                      |
| gj 115352506 | 21.1 | outer membrane protein (porin)-like protein [ <i>B.ambifaria</i> AMMD]                                          |
| gj 134294032 | 21.1 | PHB de-polymerase domain protein [ <i>B.vietnamiensis</i> G4]                                                   |
| gj 115351434 | 21   | transcription elongation factor NusA [ <i>B.ambifaria</i> AMMD]                                                 |
| gj 134292468 | 21   | aldo/keto reductase [ <i>B.vietnamiensis</i> G4]                                                                |

|              |      |                                                                                                          |
|--------------|------|----------------------------------------------------------------------------------------------------------|
| gij115352438 | 20.9 | aminotransferase, class I and II [ <i>B.ambifaria</i> AMMD]                                              |
| gij115357984 | 20.9 | OsmC family protein [ <i>B.ambifaria</i> AMMD]                                                           |
| gij116688369 | 20.9 | elongation factor G [ <i>B.cenocepacia</i> HI2424]                                                       |
| gij134294706 | 20.9 | 2-dehydro-3-deoxy-6-phosphogalactonate aldolase [ <i>B.vietnamiensis</i> G4]                             |
| gij134295692 | 20.9 | amino acid adenylation domain [ <i>B.vietnamiensis</i> G4]                                               |
| gij115350527 | 20.8 | bifunctional ornithine acetyltransferase/N-acetylglutamate synthase protein [ <i>B.ambifaria</i> AMMD]   |
| gij115351222 | 20.8 | carbamoyl phosphate synthase large subunit [ <i>B.ambifaria</i> AMMD]                                    |
| gij115352517 | 20.8 | HemY domain protein [ <i>B.ambifaria</i> AMMD]                                                           |
| gij115360458 | 20.8 | UspA domain protein [ <i>B.ambifaria</i> AMMD]                                                           |
| gij134296696 | 20.8 | isocitrate dehydrogenase, NADP-dependent [ <i>B.vietnamiensis</i> G4]                                    |
| gij115352206 | 20.7 | lysyl-tRNA synthetase [ <i>B.ambifaria</i> AMMD]                                                         |
| gij116688459 | 20.7 | histidine triad (HIT) protein [ <i>B.cenocepacia</i> HI2424]                                             |
| gij115351798 | 20.5 | Pyrrolo-quinoline quinone [ <i>B.ambifaria</i> AMMD]                                                     |
| gij115352566 | 20.5 | leucyl aminopeptidase [ <i>B.ambifaria</i> AMMD]                                                         |
| gij115353269 | 20.5 | 50S ribosomal protein L34 [ <i>B.ambifaria</i> AMMD]                                                     |
| gij116692027 | 20.5 | hypothetical protein Bcen2424_3930 [ <i>B.cenocepacia</i> HI2424]                                        |
| gij134296027 | 20.5 | elongation factor Ts [ <i>B.vietnamiensis</i> G4]                                                        |
| gij115352892 | 20.4 | formyltetrahydrofolate deformylase [ <i>B.ambifaria</i> AMMD]                                            |
| gij171319779 | 20.4 | Ferritin Dps family protein [ <i>B.ambifaria</i> MEX-5]                                                  |
| gij115350329 | 20.3 | 50S ribosomal protein L16 [ <i>B.ambifaria</i> AMMD]                                                     |
| gij134292354 | 20.3 | Glutathione S-transferase, N-terminal domain [ <i>B.vietnamiensis</i> G4]                                |
| gij134296510 | 20.2 | 3-carboxymuconate cyclase-like protein [ <i>B.vietnamiensis</i> G4]                                      |
| gij134297105 | 20.2 | arginyl-tRNA synthetase [ <i>B.vietnamiensis</i> G4]                                                     |
| gij134292511 | 20.1 | NADPH-dependent FMN reductase [ <i>B.vietnamiensis</i> G4]                                               |
| gij134294657 | 20.1 | bifunctional ornithine acetyltransferase/N-acetylglutamate synthase protein [ <i>B.vietnamiensis</i> G4] |
| gij115351956 | 20   | Glucose-6-phosphate isomerase [ <i>B.ambifaria</i> AMMD]                                                 |
| gij115352559 | 20   | protein of unknown function DUF541 [ <i>B.ambifaria</i> AMMD]                                            |
| gij115358064 | 20   | succinate dehydrogenase flavoprotein subunit [ <i>B.ambifaria</i> AMMD]                                  |
| gij134291980 | 20   | flavoprotein WrbA [ <i>B.vietnamiensis</i> G4]                                                           |
| gij116688678 | 19.9 | Rare lipoprotein B [ <i>B.cenocepacia</i> HI2424]                                                        |
| gij134294025 | 19.9 | Carbohydrate-selective porin OprB [ <i>B.vietnamiensis</i> G4]                                           |
| gij115351097 | 19.8 | GntR domain protein [ <i>B.ambifaria</i> AMMD]                                                           |
| gij134294649 | 19.8 | D-alanine--D-alanine ligase [ <i>B.vietnamiensis</i> G4]                                                 |
| gij134296968 | 19.8 | acetyl-CoA acetyltransferase [ <i>B.vietnamiensis</i> G4]                                                |
| gij11230854  | 19.7 | ornibactin synthetase F [ <i>B.cepacia</i> ]                                                             |
| gij115351785 | 19.7 | protein of unknown function DUF465 [ <i>B.ambifaria</i> AMMD]                                            |
| gij115352772 | 19.7 | cytochrome c, class I [ <i>B.ambifaria</i> AMMD]                                                         |
| gij134292531 | 19.7 | 2-nitropropane dioxygenase, NPD [ <i>B.vietnamiensis</i> G4]                                             |
| gij115350665 | 19.6 | preprotein translocase subunit YajC [ <i>B.ambifaria</i> AMMD]                                           |
| gij115351589 | 19.6 | cyclic peptide transporter [ <i>B.ambifaria</i> AMMD]                                                    |
| gij115352953 | 19.6 | cytochrome c oxidase, subunit II [ <i>B.ambifaria</i> AMMD]                                              |
| gij134291881 | 19.6 | histone family protein nucleoid-structuring protein H-NS [ <i>B.vietnamiensis</i> G4]                    |
| gij134296928 | 19.6 | import inner membrane translocase, subunit Tim44 [ <i>B.vietnamiensis</i> G4]                            |

|              |      |                                                                                              |
|--------------|------|----------------------------------------------------------------------------------------------|
| gj 91779140  | 19.6 | DNA-binding protein HU-alpha [ <i>B.xenovorans</i> LB400]                                    |
| gj 115350661 | 19.5 | Ycel family protein [ <i>B.ambifaria</i> AMMD]                                               |
| gj 115360693 | 19.5 | protein of unknown function DUF1348 [ <i>B.ambifaria</i> AMMD]                               |
| gj 134293175 | 19.5 | histone family protein DNA-binding protein [ <i>B.vietnamiensis</i> G4]                      |
| gj 134294890 | 19.5 | transport-associated [ <i>B.vietnamiensis</i> G4]                                            |
| gj 115350660 | 19.4 | Ycel family protein [ <i>B.ambifaria</i> AMMD]                                               |
| gj 115359595 | 19.4 | histone family protein nucleoid-structuring protein H-NS [ <i>B.ambifaria</i> AMMD]          |
| gj 162389966 | 19.4 | phenylalanyl-tRNA synthetase subunit alpha [ <i>B.ambifaria</i> AMMD]                        |
| gj 134294673 | 19.3 | hypothetical protein Bcep1808_0561 [ <i>B.vietnamiensis</i> G4]                              |
| gj 115353141 | 19.2 | extracellular solute-binding protein, family 5 [ <i>B.ambifaria</i> AMMD]                    |
| gj 115360327 | 19.2 | HAD-superfamily hydrolase, subfamily IA, variant 3 [ <i>B.ambifaria</i> AMMD]                |
| gj 115359494 | 19.1 | glucose-6-phosphate 1-dehydrogenase [ <i>B.ambifaria</i> AMMD]                               |
| gj 115350736 | 19   | short-chain dehydrogenase/reductase SDR [ <i>B.ambifaria</i> AMMD]                           |
| gj 115350794 | 19   | aspartate carbamoyltransferase catalytic subunit [ <i>B.ambifaria</i> AMMD]                  |
| gj 115351225 | 18.9 | protein of unknown function UPF0044 [ <i>B.ambifaria</i> AMMD]                               |
| gj 115361080 | 18.9 | Cupin 2, conserved barrel domain protein [ <i>B.ambifaria</i> AMMD]                          |
| gj 134295111 | 18.9 | hypothetical protein Bcep1808_1000 [ <i>B.vietnamiensis</i> G4]                              |
| gj 115352913 | 18.8 | ribose-phosphate pyrophosphokinase [ <i>B.ambifaria</i> AMMD]                                |
| gj 134293152 | 18.8 | aspartate-semialdehyde dehydrogenase [ <i>B.vietnamiensis</i> G4]                            |
| gj 30314432  | 18.8 | outer membrane lipoprotein precursor [ <i>B.cepacia</i> ]                                    |
| gj 115350562 | 18.7 | 3-dehydroquinone dehydratase [ <i>B.ambifaria</i> AMMD]                                      |
| gj 115350251 | 18.6 | histone family protein nucleoid-structuring protein H-NS [ <i>B.ambifaria</i> AMMD]          |
| gj 115350873 | 18.6 | hypothetical protein Bamb_0819 [ <i>B.ambifaria</i> AMMD]                                    |
| gj 115352333 | 18.6 | NADH-quinone oxidoreductase, F subunit [ <i>B.ambifaria</i> AMMD]                            |
| gj 134297208 | 18.6 | Glutathione S-transferase, N-terminal domain [ <i>B.vietnamiensis</i> G4]                    |
| gj 189349671 | 18.6 | multiple sugar transport system substrate-binding protein [ <i>B.multivorans</i> ATCC 17616] |
| gj 115352706 | 18.5 | transporter, hydrophobe/amphiphile efflux-1 (HAE1) family [ <i>B.ambifaria</i> AMMD]         |
| gj 115352963 | 18.5 | phosphoglycerate mutase 1 family [ <i>B.ambifaria</i> AMMD]                                  |
| gj 115357988 | 18.5 | hypothetical protein Bamb_3236 [ <i>B.ambifaria</i> AMMD]                                    |
| gj 115361015 | 18.5 | Antibiotic biosynthesis monooxygenase [ <i>B.ambifaria</i> AMMD]                             |
| gj 134295544 | 18.5 | alpha/beta hydrolase fold [ <i>B.vietnamiensis</i> G4]                                       |
| gj 134292157 | 18.4 | hypothetical protein Bcep1808_3440 [ <i>B.vietnamiensis</i> G4]                              |
| gj 115351394 | 18.3 | chorismate synthase [ <i>B.ambifaria</i> AMMD]                                               |
| gj 134294402 | 18.3 | 6-phosphogluconate dehydrogenase, NAD-binding [ <i>B.vietnamiensis</i> G4]                   |
| gj 115351400 | 18.2 | short chain dehydrogenase [ <i>B.ambifaria</i> AMMD]                                         |
| gj 134296331 | 18.2 | Rhodanese domain protein [ <i>B.vietnamiensis</i> G4]                                        |
| gj 115350127 | 18.1 | adenylate cyclase [ <i>B.ambifaria</i> AMMD]                                                 |
| gj 116688997 | 18.1 | thioredoxin reductase [ <i>B.cenocepacia</i> HI2424]                                         |
| gj 115350376 | 18   | Glutamate synthase (ferredoxin) [ <i>B.ambifaria</i> AMMD]                                   |
| gj 115350908 | 18   | hypothetical protein Bamb_0854 [ <i>B.ambifaria</i> AMMD]                                    |
| gj 115351008 | 18   | oligoribonuclease [ <i>B.ambifaria</i> AMMD]                                                 |
| gj 115350672 | 17.9 | Ferritin, Dps family protein [ <i>B.ambifaria</i> AMMD]                                      |

|              |      |                                                                                                                |
|--------------|------|----------------------------------------------------------------------------------------------------------------|
| gj 115352182 | 17.9 | NlpBDapX family lipoprotein [ <i>B.ambifaria</i> AMMD]                                                         |
| gj 115352330 | 17.9 | NADH dehydrogenase subunit I [ <i>B.ambifaria</i> AMMD]                                                        |
| gj 134297107 | 17.9 | DSBA oxidoreductase [ <i>B.vietnamiensis</i> G4]                                                               |
| gj 134297180 | 17.9 | protein of unknown function DUF799 [ <i>B.vietnamiensis</i> G4]                                                |
| gj 115350556 | 17.8 | PfkB domain protein [ <i>B.ambifaria</i> AMMD]                                                                 |
| gj 115358058 | 17.8 | hypothetical protein Bamb_3307 [ <i>B.ambifaria</i> AMMD]                                                      |
| gj 134293528 | 17.8 | short-chain dehydrogenase/reductase SDR [ <i>B.vietnamiensis</i> G4]                                           |
| gj 115352095 | 17.7 | surface antigen (D15) [ <i>B.ambifaria</i> AMMD]                                                               |
| gj 115353043 | 17.7 | sulfate ABC transporter, periplasmic sulfate-binding protein [ <i>B.ambifaria</i> AMMD]                        |
| gj 115353214 | 17.7 | aspartyl/glutamyl-tRNA amidotransferase subunit A [ <i>B.ambifaria</i> AMMD]                                   |
| gj 116688821 | 17.7 | hypothetical protein Bcen2424_0798 [ <i>B.cenocepacia</i> HI2424]                                              |
| gj 134297024 | 17.7 | lipoprotein, YaeC family [ <i>B.vietnamiensis</i> G4]                                                          |
| gj 189351726 | 17.7 | putative ABC transport system auxiliary component [ <i>B.multivorans</i> ATCC 17616]                           |
| gj 115359945 | 17.6 | Glycine hydroxymethyltransferase [ <i>B.ambifaria</i> AMMD]                                                    |
| gj 134292961 | 17.6 | 3-mercaptopyruvate sulfurtransferase [ <i>B.vietnamiensis</i> G4]                                              |
| gj 134294799 | 17.6 | catalase/peroxidase HPI [ <i>B.vietnamiensis</i> G4]                                                           |
| gj 134295186 | 17.6 | HAD-superfamily hydrolase, subfamily IIB [ <i>B.vietnamiensis</i> G4]                                          |
| gj 115352354 | 17.5 | acetolactate synthase 3 catalytic subunit [ <i>B.ambifaria</i> AMMD]                                           |
| gj 134295009 | 17.5 | GCN5-related N-acetyltransferase [ <i>B.vietnamiensis</i> G4]                                                  |
| gj 116688659 | 17.4 | Glyoxalase/bleomycin resistance protein/dioxygenase [ <i>B.cenocepacia</i> HI2424]                             |
| gj 116690768 | 17.4 | CHRD domain containing protein [ <i>B.cenocepacia</i> HI2424]                                                  |
| gj 134290920 | 17.4 | Carboxymethylenebutenolidase [ <i>B.vietnamiensis</i> G4]                                                      |
| gj 134291741 | 17.4 | putative signal-transduction protein with CBS domains [ <i>B.vietnamiensis</i> G4]                             |
| gj 134296606 | 17.4 | bifunctional uroporphyrinogen-III synthetase/uroporphyrin-III C-methyltransferase [ <i>B.vietnamiensis</i> G4] |
| gj 134296900 | 17.4 | dimethyladenosine transferase [ <i>B.vietnamiensis</i> G4]                                                     |
| gj 189349974 | 17.4 | polar amino acid transport system substrate-binding protein [ <i>B.multivorans</i> ATCC 17616]                 |
| gj 115350526 | 17.3 | preprotein translocase subunit SecA [ <i>B.ambifaria</i> AMMD]                                                 |
| gj 115358648 | 17.3 | electron transfer flavoprotein, alpha subunit [ <i>B.ambifaria</i> AMMD]                                       |
| gj 134294116 | 17.3 | Rhodanese domain protein [ <i>B.vietnamiensis</i> G4]                                                          |
| gj 134294637 | 17.3 | ubiquinone biosynthesis protein COQ7-like protein [ <i>B.vietnamiensis</i> G4]                                 |
| gj 115351789 | 17.2 | phosphoribosyltransferase [ <i>B.ambifaria</i> AMMD]                                                           |
| gj 115353016 | 17.2 | Methionine synthase [ <i>B.ambifaria</i> AMMD]                                                                 |
| gj 134295046 | 17.2 | aminopeptidase N [ <i>B.vietnamiensis</i> G4]                                                                  |
| gj 134295358 | 17.2 | protein of unknown function UPF0044 [ <i>B.vietnamiensis</i> G4]                                               |
| gj 115350288 | 17.1 | N-acetyl-gamma-glutamyl-phosphate reductase [ <i>B.ambifaria</i> AMMD]                                         |
| gj 134297054 | 17   | glutathione synthetase [ <i>B.vietnamiensis</i> G4]                                                            |
| gj 115351049 | 16.9 | 50S ribosomal protein L32 [ <i>B.ambifaria</i> AMMD]                                                           |
| gj 115351059 | 16.9 | sigma E regulatory protein, MucB/RseB [ <i>B.ambifaria</i> AMMD]                                               |
| gj 115351596 | 16.9 | hypothetical protein Bamb_1543 [ <i>B.ambifaria</i> AMMD]                                                      |
| gj 115351873 | 16.9 | hypothetical protein Bamb_1822 [ <i>B.ambifaria</i> AMMD]                                                      |
| gj 115352289 | 16.9 | MotA/ToIQ/ExbB proton channel [ <i>B.ambifaria</i> AMMD]                                                       |

|              |      |                                                                                                             |
|--------------|------|-------------------------------------------------------------------------------------------------------------|
| gj 115358290 | 16.9 | Acetyl-CoA hydrolase [ <i>B.ambifaria</i> AMMD]                                                             |
| gj 115358928 | 16.9 | short chain dehydrogenase [ <i>B.ambifaria</i> AMMD]                                                        |
| gj 134291069 | 16.9 | 3-hydroxybutyryl-CoA dehydrogenase [ <i>B.vietnamiensis</i> G4]                                             |
| gj 134294615 | 16.9 | protein-disulfide isomerase-like protein [ <i>B.vietnamiensis</i> G4]                                       |
| gj 134297114 | 16.9 | short chain dehydrogenase [ <i>B.vietnamiensis</i> G4]                                                      |
| gj 115350554 | 16.8 | hypothetical protein Bamb_0500 [ <i>B.ambifaria</i> AMMD]                                                   |
| gj 115350822 | 16.8 | UDP-glucose 4-epimerase [ <i>B.ambifaria</i> AMMD]                                                          |
| gj 116688684 | 16.8 | 2-dehydro-3-deoxyphosphogluconate aldolase/4-hydroxy-2-oxoglutarate aldolase [ <i>B.cenocepacia</i> HI2424] |
| gj 134291087 | 16.8 | hypothetical protein Bcep1808_5663 [ <i>B.vietnamiensis</i> G4]                                             |
| gj 134295840 | 16.8 | Pyrrolo-quinoline quinone [ <i>B.vietnamiensis</i> G4]                                                      |
| gj 83721066  | 16.8 | unnamed protein product; Similar to Hcp protein [ <i>B.thailandensis</i> E264]                              |
| gj 115350495 | 16.7 | ribulose-phosphate 3-epimerase [ <i>B.ambifaria</i> AMMD]                                                   |
| gj 115352224 | 16.7 | dihydroliipoamide acetyltransferase [ <i>B.ambifaria</i> AMMD]                                              |
| gj 11559479  | 16.7 | GspG [ <i>B.cepacia</i> ]                                                                                   |
| gj 115358099 | 16.6 | tryptophan synthase subunit beta [ <i>B.ambifaria</i> AMMD]                                                 |
| gj 116686801 | 16.6 | Linocin_M18 bacteriocin protein [ <i>B.cenocepacia</i> HI2424]                                              |
| gj 134293101 | 16.6 | hypothetical protein Bcep1808_4406 [ <i>B.vietnamiensis</i> G4]                                             |
| gj 115350390 | 16.5 | VacJ family lipoprotein [ <i>B.ambifaria</i> AMMD]                                                          |
| gj 115352434 | 16.5 | heat shock protein 90 [ <i>B.ambifaria</i> AMMD]                                                            |
| gj 115352519 | 16.5 | porphobilinogen deaminase [ <i>B.ambifaria</i> AMMD]                                                        |
| gj 116686888 | 16.5 | HAD-superfamily hydrolase, subfamily IA, variant 3 [ <i>B.cenocepacia</i> HI2424]                           |
| gj 134291073 | 16.5 | alpha/beta hydrolase fold [ <i>B.vietnamiensis</i> G4]                                                      |
| gj 115351422 | 16.4 | uncharacterized lipoprotein-like protein [ <i>B.ambifaria</i> AMMD]                                         |
| gj 116692036 | 16.4 | type II citrate synthase [ <i>B.cenocepacia</i> HI2424]                                                     |
| gj 134296618 | 16.4 | OmpA/MotB domain protein [ <i>B.vietnamiensis</i> G4]                                                       |
| gj 115350542 | 16.3 | hypothetical protein Bamb_0488 [ <i>B.ambifaria</i> AMMD]                                                   |
| gj 115360436 | 16.3 | bifunctional aconitate hydratase 2/2-methylisocitrate dehydratase [ <i>B.ambifaria</i> AMMD]                |
| gj 134295690 | 16.3 | periplasmic binding protein [ <i>B.vietnamiensis</i> G4]                                                    |
| gj 134297038 | 16.3 | cytochrome c oxidase, subunit II [ <i>B.vietnamiensis</i> G4]                                               |
| gj 134294758 | 16.2 | 30S ribosomal protein S9 [ <i>B.vietnamiensis</i> G4]                                                       |
| gj 115358569 | 16.1 | acetoacetyl-CoA reductase [ <i>B.ambifaria</i> AMMD]                                                        |
| gj 116688829 | 16.1 | serine hydroxymethyltransferase [ <i>B.cenocepacia</i> HI2424]                                              |
| gj 134283475 | 16.1 | cmaB protein [ <i>B.pseudomallei</i> 305]                                                                   |
| gj 115352571 | 16   | sulfate adenyltransferase, large subunit [ <i>B.ambifaria</i> AMMD]                                         |
| gj 115352822 | 16   | acetyl-CoA acetyltransferase [ <i>B.ambifaria</i> AMMD]                                                     |
| gj 115352572 | 15.9 | sulfate adenyltransferase subunit 2 [ <i>B.ambifaria</i> AMMD]                                              |
| gj 115358572 | 15.9 | Alcohol dehydrogenase GroES domain protein [ <i>B.ambifaria</i> AMMD]                                       |
| gj 134293105 | 15.9 | succinate dehydrogenase, cytochrome b subunit [ <i>B.vietnamiensis</i> G4]                                  |
| gj 134294671 | 15.9 | GTPase ObgE [ <i>B.vietnamiensis</i> G4]                                                                    |
| gj 189350815 | 15.9 | small subunit ribosomal protein S2 [ <i>B.multivorans</i> ATCC 17616]                                       |
| gj 115351403 | 15.8 | 3-oxoacid CoA-transferase, A subunit [ <i>B.ambifaria</i> AMMD]                                             |
| gj 115352107 | 15.8 | peptide deformylase [ <i>B.ambifaria</i> AMMD]                                                              |
| gj 115352387 | 15.8 | iojap-like protein [ <i>B.ambifaria</i> AMMD]                                                               |
| gj 115352905 | 15.8 | HPr kinase/phosphorylase [ <i>B.ambifaria</i> AMMD]                                                         |

|              |      |                                                                                                                         |
|--------------|------|-------------------------------------------------------------------------------------------------------------------------|
| gj 115359149 | 15.8 | hypothetical protein Bamb_4401 [ <i>B.ambifaria</i> AMMD]                                                               |
| gj 115359511 | 15.8 | cationic amino acid ABC transporter, periplasmic binding protein [ <i>B.ambifaria</i> AMMD]                             |
| gj 134296393 | 15.8 | uncharacterized protein probably involved in high-affinity Fe <sup>2+</sup> transport [ <i>B.vietnamiensis</i> G4]      |
| gj 115351503 | 15.7 | ribose-5-phosphate isomerase A [ <i>B.ambifaria</i> AMMD]                                                               |
| gj 115352090 | 15.7 | lipid-A-disaccharide synthase [ <i>B.ambifaria</i> AMMD]                                                                |
| gj 134292091 | 15.7 | hypothetical protein Bcep1808_3374 [ <i>B.vietnamiensis</i> G4]                                                         |
| gj 134294620 | 15.7 | Indole-3-glycerol-phosphate synthase [ <i>B.vietnamiensis</i> G4]                                                       |
| gj 134294723 | 15.7 | transketolase [ <i>B.vietnamiensis</i> G4]                                                                              |
| gj 83720445  | 15.7 | pyridine nucleotide-disulphide oxidoreductase, class II [ <i>B.thailandensis</i> E264]                                  |
| gj 115351590 | 15.6 | amino acid adenylation domain [ <i>B.ambifaria</i> AMMD]                                                                |
| gj 115352541 | 15.6 | aspartate alpha-decarboxylase [ <i>B.ambifaria</i> AMMD]                                                                |
| gj 116690813 | 15.6 | putative PTS IIA-like nitrogen-regulatory protein PtsN [ <i>B.cenocepacia</i> HI2424]                                   |
| gj 134292523 | 15.6 | VacJ family lipoprotein [ <i>B.vietnamiensis</i> G4]                                                                    |
| gj 115358006 | 15.5 | GatB/Yqey domain protein [ <i>B.ambifaria</i> AMMD]                                                                     |
| gj 115358454 | 15.5 | short-chain dehydrogenase/reductase SDR [ <i>B.ambifaria</i> AMMD]                                                      |
| gj 116688305 | 15.5 | histone family protein nucleoid-structuring protein H-NS [ <i>B.cenocepacia</i> HI2424]                                 |
| gj 134295160 | 15.5 | protease Do [ <i>B.vietnamiensis</i> G4]                                                                                |
| gj 134295363 | 15.5 | phosphate ABC transporter, periplasmic phosphate-binding protein [ <i>B.vietnamiensis</i> G4]                           |
| gj 160699072 | 15.5 | glutamine synthetase, type I [ <i>B.mallei</i> ATCC 10399]                                                              |
| gj 115351339 | 15.4 | alanyl-tRNA synthetase [ <i>B.ambifaria</i> AMMD]                                                                       |
| gj 115358450 | 15.4 | ThiJ/Pfpl domain protein [ <i>B.ambifaria</i> AMMD]                                                                     |
| gj 134295561 | 15.4 | uncharacterized lipoprotein-like protein [ <i>B.vietnamiensis</i> G4]                                                   |
| gj 38640325  | 15.4 | Bcep22gp17 [B.phage Bcep22]                                                                                             |
| gj 115352589 | 15.3 | bifunctional N-succinyldiaminopimelate-aminotransferase/acetylornithine transaminase protein [ <i>B.ambifaria</i> AMMD] |
| gj 115358000 | 15.3 | Polyprenyl synthetase [ <i>B.ambifaria</i> AMMD]                                                                        |
| gj 116690730 | 15.3 | PpiC-type peptidyl-prolyl cis-trans isomerase [ <i>B.cenocepacia</i> HI2424]                                            |
| gj 134293840 | 15.3 | chlorinating enzyme [ <i>B.vietnamiensis</i> G4]                                                                        |
| gj 189351807 | 15.3 | large subunit ribosomal protein L7/L12 [ <i>B.multivorans</i> ATCC 17616]                                               |
| gj 116688978 | 15.2 | transcription antitermination protein NusB [ <i>B.cenocepacia</i> HI2424]                                               |
| gj 134296596 | 15.2 | outer membrane protein (porin)-like protein [ <i>B.vietnamiensis</i> G4]                                                |
| gj 134291887 | 15.1 | hypothetical protein Bcep1808_6504 [ <i>B.vietnamiensis</i> G4]                                                         |
| gj 115352092 | 15   | (3R)-hydroxymyristoyl-(acyl carrier protein) dehydratase [ <i>B.ambifaria</i> AMMD]                                     |
| gj 115352349 | 15   | 2-isopropylmalate synthase [ <i>B.ambifaria</i> AMMD]                                                                   |
| gj 967990    | 15   | outer membrane protein [ <i>B.cepacia</i> ]                                                                             |
| gj 115359090 | 14.9 | peptidase M20 [ <i>B.ambifaria</i> AMMD]                                                                                |
| gj 134292440 | 14.9 | phospho-2-dehydro-3-deoxyheptonate aldolase [ <i>B.vietnamiensis</i> G4]                                                |
| gj 115350352 | 14.8 | delta-aminolevulinic acid dehydratase [ <i>B.ambifaria</i> AMMD]                                                        |
| gj 115351444 | 14.8 | dihydrolipoamide acetyltransferase [ <i>B.ambifaria</i> AMMD]                                                           |

|              |      |                                                                                                             |
|--------------|------|-------------------------------------------------------------------------------------------------------------|
| gj 115352213 | 14.8 | scaffold protein [ <i>B.ambifaria</i> AMMD]                                                                 |
| gj 115352531 | 14.8 | deoxycytidine triphosphate deaminase [ <i>B.ambifaria</i> AMMD]                                             |
| gj 115352652 | 14.8 | ornithine carbamoyltransferase [ <i>B.ambifaria</i> AMMD]                                                   |
| gj 134294522 | 14.8 | imidazole glycerol phosphate synthase subunit HisF [ <i>B.vietnamiensis</i> G4]                             |
| gj 134295476 | 14.8 | hypothetical protein Bcep1808_1367 [ <i>B.vietnamiensis</i> G4]                                             |
| gj 134296332 | 14.8 | molybdopterin binding domain [ <i>B.vietnamiensis</i> G4]                                                   |
| gj 134296524 | 14.8 | transaldolase B [ <i>B.vietnamiensis</i> G4]                                                                |
| gj 189349244 | 14.8 | probable translation factor [ <i>B.multivorans</i> ATCC 17616]                                              |
| gj 115352073 | 14.7 | bifunctional GMP synthase/glutamine amidotransferase protein [ <i>B.ambifaria</i> AMMD]                     |
| gj 115359379 | 14.7 | transcriptional regulator, TetR family [ <i>B.ambifaria</i> AMMD]                                           |
| gj 115359705 | 14.7 | NADPH-dependent FMN reductase [ <i>B.ambifaria</i> AMMD]                                                    |
| gj 116692461 | 14.7 | UspA domain protein [ <i>B.cenocepacia</i> HI2424]                                                          |
| gj 134295695 | 14.7 | TonB-dependent siderophore receptor [ <i>B.vietnamiensis</i> G4]                                            |
| gj 134295696 | 14.7 | folate-dependent phosphoribosylglycinamide formyltransferase PurN-like protein [ <i>B.vietnamiensis</i> G4] |
| gj 115358321 | 14.6 | extracellular solute-binding protein, family 5 [ <i>B.ambifaria</i> AMMD]                                   |
| gj 116689772 | 14.6 | extracellular solute-binding protein, family 1 [ <i>B.cenocepacia</i> HI2424]                               |
| gj 116690629 | 14.6 | efflux transporter, RND family, MFP subunit [ <i>B.cenocepacia</i> HI2424]                                  |
| gj 134293676 | 14.6 | Alcohol dehydrogenase GroES domain protein [ <i>B.vietnamiensis</i> G4]                                     |
| gj 134295825 | 14.6 | competence lipoprotein ComL [ <i>B.vietnamiensis</i> G4]                                                    |
| gj 134296697 | 14.6 | isocitrate dehydrogenase [ <i>B.vietnamiensis</i> G4]                                                       |
| gj 134296996 | 14.6 | outer membrane lipoprotein LolB [ <i>B.vietnamiensis</i> G4]                                                |
| gj 115350157 | 14.5 | uroporphyrinogen decarboxylase [ <i>B.ambifaria</i> AMMD]                                                   |
| gj 115351790 | 14.5 | adenylosuccinate synthetase [ <i>B.ambifaria</i> AMMD]                                                      |
| gj 116693798 | 14.5 | protein of unknown function DUF1348 [ <i>B.cenocepacia</i> HI2424]                                          |
| gj 189348254 | 14.5 | alcohol dehydrogenase [ <i>B.multivorans</i> ATCC 17616]                                                    |
| gj 189351773 | 14.5 | small subunit ribosomal protein S4 [ <i>B.multivorans</i> ATCC 17616]                                       |
| gj 3769514   | 14.5 | unknown [ <i>B.cepacia</i> ]                                                                                |
| gj 11230853  | 14.4 | ornibactin receptor precursor [ <i>B.cepacia</i> ]                                                          |
| gj 116688624 | 14.4 | Redoxin domain protein [ <i>B.cenocepacia</i> HI2424]                                                       |
| gj 115351028 | 14.3 | CreA family protein [ <i>B.ambifaria</i> AMMD]                                                              |
| gj 115360735 | 14.3 | Carboxymethylenebutenolidase [ <i>B.ambifaria</i> AMMD]                                                     |
| gj 134294508 | 14.3 | VacJ family lipoprotein [ <i>B.vietnamiensis</i> G4]                                                        |
| gj 115352899 | 14.2 | protein of unknown function DUF1239 [ <i>B.ambifaria</i> AMMD]                                              |
| gj 115353186 | 14.2 | cobalamin synthesis protein, P47K [ <i>B.ambifaria</i> AMMD]                                                |
| gj 134294810 | 14.2 | globin [ <i>B.vietnamiensis</i> G4]                                                                         |
| gj 134294995 | 14.2 | extracellular solute-binding protein, family 1 [ <i>B.vietnamiensis</i> G4]                                 |
| gj 115350366 | 14.1 | shikimate kinase [ <i>B.ambifaria</i> AMMD]                                                                 |
| gj 115351585 | 14.1 | ABC transporter related [ <i>B.ambifaria</i> AMMD]                                                          |
| gj 116688302 | 14.1 | Extracellular ligand-binding receptor [ <i>B.cenocepacia</i> HI2424]                                        |
| gj 134295171 | 14.1 | elongation factor P [ <i>B.vietnamiensis</i> G4]                                                            |
| gj 134296009 | 14.1 | band 7 protein [ <i>B.vietnamiensis</i> G4]                                                                 |
| gj 160699730 | 14.1 | phasin family protein [ <i>B.mallei</i> ATCC 10399]                                                         |
| gj 115351060 | 14   | protease Do [ <i>B.ambifaria</i> AMMD]                                                                      |
| gj 115351500 | 14   | ribonuclease R [ <i>B.ambifaria</i> AMMD]                                                                   |



|              |      |                                                                                                           |
|--------------|------|-----------------------------------------------------------------------------------------------------------|
| gij115353128 | 14   | Glutathione S-transferase, N-terminal domain [ <i>B.ambifaria</i> AMMD]                                   |
| gij116689062 | 14   | OmpA/MotB domain protein [ <i>B.cenocepacia</i> HI2424]                                                   |
| gij116689575 | 14   | extracellular solute-binding protein, family 3 [ <i>B.cenocepacia</i> HI2424]                             |
| gij134294332 | 14   | putative CheW protein [ <i>B.vietnamiensis</i> G4]                                                        |
| gij115351810 | 13.9 | peptidase M23B [ <i>B.ambifaria</i> AMMD]                                                                 |
| gij134293587 | 13.8 | UspA domain protein [ <i>B.vietnamiensis</i> G4]                                                          |
| gij115351800 | 13.7 | histidyl-tRNA synthetase [ <i>B.ambifaria</i> AMMD]                                                       |
| gij115360171 | 13.7 | O-acetylhomoserine/O-acetylserine sulfhydrylase [ <i>B.ambifaria</i> AMMD]                                |
| gij116690641 | 13.7 | phospholipase/lecithinase/hemolysin-like protein [ <i>B.cenocepacia</i> HI2424]                           |
| gij134295970 | 13.7 | alkyl hydroperoxide reductase/ Thiol specific antioxidant/ Mal allergen [ <i>B.vietnamiensis</i> G4]      |
| gij134296645 | 13.7 | leucyl aminopeptidase [ <i>B.vietnamiensis</i> G4]                                                        |
| gij134297013 | 13.7 | cytochrome bd ubiquinol oxidase, subunit I [ <i>B.vietnamiensis</i> G4]                                   |
| gij115350260 | 13.6 | transport-associated [ <i>B.ambifaria</i> AMMD]                                                           |
| gij115352351 | 13.6 | phosphatidylserine decarboxylase [ <i>B.ambifaria</i> AMMD]                                               |
| gij115352607 | 13.6 | Fmu (Sun) domain protein [ <i>B.ambifaria</i> AMMD]                                                       |
| gij115352834 | 13.6 | ubiquinone/menaquinone biosynthesis methyltransferase [ <i>B.ambifaria</i> AMMD]                          |
| gij134292879 | 13.6 | aldehyde dehydrogenase [ <i>B.vietnamiensis</i> G4]                                                       |
| gij134296276 | 13.6 | dihydrodipicolinate synthase [ <i>B.vietnamiensis</i> G4]                                                 |
| gij115358509 | 13.5 | aromatic amino acid aminotransferase [ <i>B.ambifaria</i> AMMD]                                           |
| gij134294113 | 13.5 | Lysine decarboxylase [ <i>B.vietnamiensis</i> G4]                                                         |
| gij91781830  | 13.5 | Putative acyltransferase [ <i>B.xenovorans</i> LB400]                                                     |
| gij115350914 | 13.4 | DNA-directed RNA polymerase subunit omega [ <i>B.ambifaria</i> AMMD]                                      |
| gij115352534 | 13.4 | OmpA/MotB domain protein [ <i>B.ambifaria</i> AMMD]                                                       |
| gij115360253 | 13.4 | aldehyde dehydrogenase [ <i>B.ambifaria</i> AMMD]                                                         |
| gij134294833 | 13.4 | phosphoribosylaminoimidazole synthetase [ <i>B.vietnamiensis</i> G4]                                      |
| gij134295841 | 13.4 | hypothetical protein Bcep1808_1737 [ <i>B.vietnamiensis</i> G4]                                           |
| gij134296641 | 13.4 | protein of unknown function DUF541 [ <i>B.vietnamiensis</i> G4]                                           |
| gij134296951 | 13.4 | peptidase M48, Ste24p [ <i>B.vietnamiensis</i> G4]                                                        |
| gij189351857 | 13.4 | putative histone-like nucleoid-structuring protein H-NS [ <i>B.multivorans</i> ATCC 17616]                |
| gij115350218 | 13.3 | histone family protein nucleoid-structuring protein H-NS [ <i>B.ambifaria</i> AMMD]                       |
| gij115351777 | 13.3 | polyhydroxyalkonate synthesis repressor, PhaR [ <i>B.ambifaria</i> AMMD]                                  |
| gij115351989 | 13.3 | large conductance mechanosensitive channel protein [ <i>B.ambifaria</i> AMMD]                             |
| gij10697312  | 13.2 | aspartate transcarbamoylase [ <i>B.cepacia</i> ]                                                          |
| gij115352191 | 13.2 | transferase hexapeptide repeat containing protein [ <i>B.ambifaria</i> AMMD]                              |
| gij189353572 | 13.1 | lysine decarboxylase [ <i>B.multivorans</i> ATCC 17616]                                                   |
| gij115352185 | 13   | tryptophanyl-tRNA synthetase [ <i>B.ambifaria</i> AMMD]                                                   |
| gij134294741 | 13   | 2-dehydro-3-deoxyphosphogluconate aldolase/4-hydroxy-2-oxoglutarate aldolase [ <i>B.vietnamiensis</i> G4] |
| gij134296016 | 13   | UDP-N-acetylglucosamine acyltransferase [ <i>B.vietnamiensis</i> G4]                                      |

|              |      |                                                                                                                             |
|--------------|------|-----------------------------------------------------------------------------------------------------------------------------|
| gj 189351863 | 13   | carboxymethylenebutenolidase [ <i>B.multivorans</i> ATCC 17616]                                                             |
| gj 115350684 | 12.9 | phospho-2-dehydro-3-heoxyheptonate aldolase [ <i>B.ambifaria</i> AMMD]                                                      |
| gj 115359889 | 12.9 | protein of unknown function UPF0047 [ <i>B.ambifaria</i> AMMD]                                                              |
| gj 115360277 | 12.9 | hypothetical protein Bamb_5534 [ <i>B.ambifaria</i> AMMD]                                                                   |
| gj 116690511 | 12.9 | bifunctional N-succinyldiaminopimelate-aminotransferase/acetylornithine transaminase protein [ <i>B.cenocepacia</i> HI2424] |
| gj 134295343 | 12.9 | Glutathione S-transferase, N-terminal domain [ <i>B.vietnamiensis</i> G4]                                                   |
| gj 189351255 | 12.9 | acetylornithine aminotransferase [ <i>B.multivorans</i> ATCC 17616]                                                         |
| gj 189352365 | 12.9 | putative lipoprotein [ <i>B.multivorans</i> ATCC 17616]                                                                     |
| gj 115353190 | 12.8 | ATP-dependent protease ATP-binding subunit [ <i>B.ambifaria</i> AMMD]                                                       |
| gj 116688989 | 12.8 | 6-phosphogluconolactonase [ <i>B.cenocepacia</i> HI2424]                                                                    |
| gj 116690741 | 12.8 | acyl-CoA dehydrogenase domain protein [ <i>B.cenocepacia</i> HI2424]                                                        |
| gj 134294340 | 12.8 | hypothetical protein Bcep1808_0224 [ <i>B.vietnamiensis</i> G4]                                                             |
| gj 134294589 | 12.8 | Water Stress and Hypersensitive response [ <i>B.vietnamiensis</i> G4]                                                       |
| gj 134295605 | 12.8 | RNA chaperone Hfq [ <i>B.vietnamiensis</i> G4]                                                                              |
| gj 115350319 | 12.7 | elongation factor G [ <i>B.ambifaria</i> AMMD]                                                                              |
| gj 115351591 | 12.7 | amino acid adenylation domain [ <i>B.ambifaria</i> AMMD]                                                                    |
| gj 115352196 | 12.7 | 2-dehydro-3-deoxyphosphooctonate aldolase [ <i>B.ambifaria</i> AMMD]                                                        |
| gj 115358526 | 12.7 | UspA domain protein [ <i>B.ambifaria</i> AMMD]                                                                              |
| gj 134292438 | 12.7 | PRC-barrel domain protein [ <i>B.vietnamiensis</i> G4]                                                                      |
| gj 134293649 | 12.7 | Succinate-semialdehyde dehydrogenase (NAD(P)(+)) [ <i>B.vietnamiensis</i> G4]                                               |
| gj 134296733 | 12.7 | adenylate kinase [ <i>B.vietnamiensis</i> G4]                                                                               |
| gj 134295884 | 12.6 | threonine synthase [ <i>B.vietnamiensis</i> G4]                                                                             |
| gj 134295896 | 12.6 | PhoH family protein [ <i>B.vietnamiensis</i> G4]                                                                            |
| gj 134296445 | 12.6 | phosphatidylserine decarboxylase [ <i>B.vietnamiensis</i> G4]                                                               |
| gj 134296972 | 12.6 | Cobyrinic acid a,c-diamide synthase [ <i>B.vietnamiensis</i> G4]                                                            |
| gj 115352576 | 12.5 | transcriptional regulator CysB-like protein [ <i>B.ambifaria</i> AMMD]                                                      |
| gj 115350202 | 12.4 | FAD dependent oxidoreductase [ <i>B.ambifaria</i> AMMD]                                                                     |
| gj 115351853 | 12.4 | alkyl hydroperoxide reductase/ Thiol specific antioxidant/ Mal allergen [ <i>B.ambifaria</i> AMMD]                          |
| gj 115352414 | 12.4 | polyhydroxyalkanoate depolymerase, intracellular [ <i>B.ambifaria</i> AMMD]                                                 |
| gj 115358872 | 12.4 | putative signal-transduction protein with CBS domains [ <i>B.ambifaria</i> AMMD]                                            |
| gj 134292688 | 12.4 | outer membrane efflux protein [ <i>B.vietnamiensis</i> G4]                                                                  |
| gj 115351020 | 12.3 | fumarate hydratase [ <i>B.ambifaria</i> AMMD]                                                                               |
| gj 116688703 | 12.3 | 30S ribosomal protein S9 [ <i>B.cenocepacia</i> HI2424]                                                                     |
| gj 116689322 | 12.3 | phosphate ABC transporter, periplasmic phosphate-binding protein [ <i>B.cenocepacia</i> HI2424]                             |
| gj 134293450 | 12.3 | methyl-accepting chemotaxis sensory transducer [ <i>B.vietnamiensis</i> G4]                                                 |
| gj 134294625 | 12.3 | ribulose-phosphate 3-epimerase [ <i>B.vietnamiensis</i> G4]                                                                 |
| gj 134297260 | 12.3 | protein of unknown function DUF484 [ <i>B.vietnamiensis</i> G4]                                                             |
| gj 134297272 | 12.3 | nucleoid occlusion protein [ <i>B.vietnamiensis</i> G4]                                                                     |
| gj 115352139 | 12.2 | glutamyl-tRNA synthetase [ <i>B.ambifaria</i> AMMD]                                                                         |

|              |      |                                                                                                             |
|--------------|------|-------------------------------------------------------------------------------------------------------------|
| gj 115352332 | 12.2 | NADH dehydrogenase subunit G [ <i>B.ambifaria</i> AMMD]                                                     |
| gj 134295820 | 12.2 | acetyl-CoA reductase [ <i>B.vietnamiensis</i> G4]                                                           |
| gj 189350933 | 12.2 | phasin family protein [ <i>B.multivorans</i> ATCC 17616]                                                    |
| gj 116690548 | 12.1 | translation elongation factor G [ <i>B.cenocepacia</i> HI2424]                                              |
| gj 116691123 | 12.1 | exodeoxyribonuclease III Xth [ <i>B.cenocepacia</i> HI2424]                                                 |
| gj 134294242 | 12.1 | Prephenate dehydratase [ <i>B.vietnamiensis</i> G4]                                                         |
| gj 134294354 | 12.1 | Extracellular ligand-binding receptor [ <i>B.vietnamiensis</i> G4]                                          |
| gj 115350574 | 12   | 2-dehydro-3-deoxy-6-phosphogalactonate aldolase [ <i>B.ambifaria</i> AMMD]                                  |
| gj 115350604 | 12   | Rare lipoprotein B [ <i>B.ambifaria</i> AMMD]                                                               |
| gj 115351124 | 12   | Redoxin domain protein [ <i>B.ambifaria</i> AMMD]                                                           |
| gj 115351959 | 12   | PpiC-type peptidyl-prolyl cis-trans isomerase [ <i>B.ambifaria</i> AMMD]                                    |
| gj 115358093 | 12   | isopropylmalate isomerase small subunit [ <i>B.ambifaria</i> AMMD]                                          |
| gj 134291545 | 12   | transport-associated [ <i>B.vietnamiensis</i> G4]                                                           |
| gj 134294488 | 12   | 3-dehydroquininate synthase [ <i>B.vietnamiensis</i> G4]                                                    |
| gj 134295159 | 12   | sigma E regulatory protein, MucB/RseB [ <i>B.vietnamiensis</i> G4]                                          |
| gj 115351071 | 11.9 | elongation factor P [ <i>B.ambifaria</i> AMMD]                                                              |
| gj 134291893 | 11.9 | predicted glycosyl transferase [ <i>B.vietnamiensis</i> G4]                                                 |
| gj 134292239 | 11.9 | aldehyde dehydrogenase [ <i>B.vietnamiensis</i> G4]                                                         |
| gj 134293103 | 11.9 | malate dehydrogenase [ <i>B.vietnamiensis</i> G4]                                                           |
| gj 134294279 | 11.9 | cytochrome c, class I [ <i>B.vietnamiensis</i> G4]                                                          |
| gj 134294490 | 11.9 | glycerol-3-phosphate transporter periplasmic binding protein [ <i>B.vietnamiensis</i> G4]                   |
| gj 115350188 | 11.8 | glycine cleavage system H protein [ <i>B.ambifaria</i> AMMD]                                                |
| gj 116689500 | 11.8 | 50S ribosomal protein L20 [ <i>B.cenocepacia</i> HI2424]                                                    |
| gj 116689532 | 11.8 | dihydrolipoamide dehydrogenase [ <i>B.cenocepacia</i> HI2424]                                               |
| gj 134294571 | 11.8 | Tetratricopeptide TPR_2 repeat protein [ <i>B.vietnamiensis</i> G4]                                         |
| gj 134295573 | 11.8 | transcription elongation factor NusA [ <i>B.vietnamiensis</i> G4]                                           |
| gj 134295811 | 11.8 | Alcohol dehydrogenase, zinc-binding domain protein [ <i>B.vietnamiensis</i> G4]                             |
| gj 189349587 | 11.8 | pyrimidine operon attenuation protein / uracil phosphoribosyltransferase [ <i>B.multivorans</i> ATCC 17616] |
| gj 115350795 | 11.7 | dihydroorotase [ <i>B.ambifaria</i> AMMD]                                                                   |
| gj 116689940 | 11.7 | lipolytic enzyme, G-D-S-L family [ <i>B.cenocepacia</i> HI2424]                                             |
| gj 134295071 | 11.7 | OmpA/MotB domain protein [ <i>B.vietnamiensis</i> G4]                                                       |
| gj 171320747 | 11.7 | peptidyl-prolyl cis-trans isomerase cyclophilin type [ <i>B.ambifaria</i> MEX-5]                            |
| gj 115350541 | 11.6 | gamma-glutamyl kinase [ <i>B.ambifaria</i> AMMD]                                                            |
| gj 115350652 | 11.6 | putative RNA methylase [ <i>B.ambifaria</i> AMMD]                                                           |
| gj 116688550 | 11.6 | protein-disulfide isomerase-like protein [ <i>B.cenocepacia</i> HI2424]                                     |
| gj 116689064 | 11.6 | hypothetical protein Bcen2424_1041 [ <i>B.cenocepacia</i> HI2424]                                           |
| gj 134294633 | 11.6 | enoyl-CoA hydratase [ <i>B.vietnamiensis</i> G4]                                                            |
| gj 134294875 | 11.6 | transcriptional regulator, LysR family [ <i>B.vietnamiensis</i> G4]                                         |
| gj 134296848 | 11.6 | general secretion pathway protein H [ <i>B.vietnamiensis</i> G4]                                            |
| gj 115350931 | 11.5 | fructose-1,6-bisphosphatase [ <i>B.ambifaria</i> AMMD]                                                      |
| gj 115358107 | 11.5 | O-succinylhomoserine sulphydrylase [ <i>B.ambifaria</i> AMMD]                                               |
| gj 115359283 | 11.5 | ABC transporter related [ <i>B.ambifaria</i> AMMD]                                                          |
| gj 115359332 | 11.5 | enoyl-CoA hydratase [ <i>B.ambifaria</i> AMMD]                                                              |
| gj 116691933 | 11.5 | Peptidylprolyl isomerase [ <i>B.cenocepacia</i> HI2424]                                                     |
| gj 116692966 | 11.5 | phosphate acetyltransferase [ <i>B.cenocepacia</i> HI2424]                                                  |

|              |      |                                                                                              |
|--------------|------|----------------------------------------------------------------------------------------------|
| gj 134293107 | 11.5 | succinate dehydrogenase flavoprotein subunit [ <i>B.vietnamiensis</i> G4]                    |
| gj 134296995 | 11.5 | Tetratricopeptide TPR_2 repeat protein [ <i>B.vietnamiensis</i> G4]                          |
| gj 14572550  | 11.5 | RuvB [ <i>B.cepacia</i> ]                                                                    |
| gj 115350932 | 11.4 | aminopeptidase N [ <i>B.ambifaria</i> AMMD]                                                  |
| gj 115359750 | 11.4 | aldo/keto reductase [ <i>B.ambifaria</i> AMMD]                                               |
| gj 116689854 | 11.4 | 50S ribosomal protein L31 type B [ <i>B.cenocepacia</i> HI2424]                              |
| gj 134292441 | 11.4 | protein of unknown function DUF480 [ <i>B.vietnamiensis</i> G4]                              |
| gj 134293978 | 11.4 | short chain dehydrogenase [ <i>B.vietnamiensis</i> G4]                                       |
| gj 115357980 | 11.3 | molybdenum ABC transporter, periplasmic molybdate-binding protein [ <i>B.ambifaria</i> AMMD] |
| gj 189350468 | 11.3 | pyoverdine biosynthesis gene [ <i>B.multivorans</i> ATCC 17616]                              |
| gj 115350560 | 11.2 | acetyl-CoA carboxylase biotin carboxylase subunit [ <i>B.ambifaria</i> AMMD]                 |
| gj 115352901 | 11.2 | ABC transporter related [ <i>B.ambifaria</i> AMMD]                                           |
| gj 115360930 | 11.2 | UTP-glucose-1-phosphate uridylyltransferase [ <i>B.ambifaria</i> AMMD]                       |
| gj 115350156 | 11.1 | Prephenate dehydratase [ <i>B.ambifaria</i> AMMD]                                            |
| gj 115350880 | 11.1 | 6-phosphogluconolactonase [ <i>B.ambifaria</i> AMMD]                                         |
| gj 115351593 | 11.1 | lysine/ornithine N-monooxygenase [ <i>B.ambifaria</i> AMMD]                                  |
| gj 116689821 | 11.1 | phosphoribosyltransferase [ <i>B.cenocepacia</i> HI2424]                                     |
| gj 134295351 | 11.1 | Lytic transglycosylase, catalytic [ <i>B.vietnamiensis</i> G4]                               |
| gj 134295216 | 11   | extracellular solute-binding protein, family 3 [ <i>B.vietnamiensis</i> G4]                  |
| gj 189350947 | 11   | glutamine synthetase [ <i>B.multivorans</i> ATCC 17616]                                      |
| gj 115350212 | 10.9 | flagellin [ <i>B.ambifaria</i> AMMD]                                                         |
| gj 115350296 | 10.9 | transcriptional regulator, AsnC family [ <i>B.ambifaria</i> AMMD]                            |
| gj 115350576 | 10.9 | periplasmic binding protein/LacI transcriptional regulator [ <i>B.ambifaria</i> AMMD]        |
| gj 115352341 | 10.9 | Alcohol dehydrogenase, zinc-binding domain protein [ <i>B.ambifaria</i> AMMD]                |
| gj 115352610 | 10.9 | isoleucyl-tRNA synthetase [ <i>B.ambifaria</i> AMMD]                                         |
| gj 116691099 | 10.9 | S-adenosylmethionine synthetase [ <i>B.cenocepacia</i> HI2424]                               |
| gj 134295574 | 10.9 | translation initiation factor IF-2 [ <i>B.vietnamiensis</i> G4]                              |
| gj 134296988 | 10.9 | sigma 54 modulation protein/ribosomal protein S30EA [ <i>B.vietnamiensis</i> G4]             |
| gj 115350475 | 10.8 | putative ABC transporter ATP-binding protein [ <i>B.ambifaria</i> AMMD]                      |
| gj 115353021 | 10.8 | DSBA oxidoreductase [ <i>B.ambifaria</i> AMMD]                                               |
| gj 115360696 | 10.8 | Alpha/beta hydrolase fold-3 domain protein [ <i>B.ambifaria</i> AMMD]                        |
| gj 134294938 | 10.8 | Phosphomannomutase [ <i>B.vietnamiensis</i> G4]                                              |
| gj 134297058 | 10.8 | protein of unknown function DUF526 [ <i>B.vietnamiensis</i> G4]                              |
| gj 115350985 | 10.7 | cysteine synthase B [ <i>B.ambifaria</i> AMMD]                                               |
| gj 115352406 | 10.7 | DEAD/DEAH box helicase domain protein [ <i>B.ambifaria</i> AMMD]                             |
| gj 116689892 | 10.7 | 50S ribosomal protein L9 [ <i>B.cenocepacia</i> HI2424]                                      |
| gj 134295673 | 10.7 | hypothetical protein Bcep1808_1566 [ <i>B.vietnamiensis</i> G4]                              |
| gj 115361243 | 10.6 | pyruvate dehydrogenase complex dihydrolipoamide acetyltransferase [ <i>B.ambifaria</i> AMMD] |
| gj 116692259 | 10.6 | extracellular solute-binding protein, family 5 [ <i>B.cenocepacia</i> HI2424]                |
| gj 134295025 | 10.6 | ribonuclease PH [ <i>B.vietnamiensis</i> G4]                                                 |
| gj 189349830 | 10.6 | conserved hypothetical protein [ <i>B.multivorans</i> ATCC 17616]                            |

|              |      |                                                                                                   |
|--------------|------|---------------------------------------------------------------------------------------------------|
| gj 115352699 | 10.5 | periplasmic solute binding protein [ <i>B.ambifaria</i> AMMD]                                     |
| gj 115352720 | 10.5 | Sua5/YciO/YrdC/YwIC family protein [ <i>B.ambifaria</i> AMMD]                                     |
| gj 115353236 | 10.5 | DNA topoisomerase III [ <i>B.ambifaria</i> AMMD]                                                  |
| gj 116688692 | 10.4 | extracellular solute-binding protein, family 3 [ <i>B.cenocepacia</i> HI2424]                     |
| gj 116689933 | 10.4 | PpiC-type peptidyl-prolyl cis-trans isomerase [ <i>B.cenocepacia</i> HI2424]                      |
| gj 116691351 | 10.4 | pyruvate dehydrogenase complex dihydrolipoamide acetyltransferase [ <i>B.cenocepacia</i> HI2424]  |
| gj 134296965 | 10.4 | hypothetical protein Bcep1808_2874 [ <i>B.vietnamiensis</i> G4]                                   |
| gj 160696587 | 10.4 | 6,7-dimethyl-8-ribityllumazine synthase [ <i>B.mallei</i> ATCC 10399]                             |
| gj 171316822 | 10.4 | Substrate-binding region of ABC-type glycine betaine transport system [ <i>B.ambifaria</i> MEX-5] |
| gj 115350540 | 10.3 | GTPase ObgE [ <i>B.ambifaria</i> AMMD]                                                            |
| gj 115351584 | 10.3 | Taurine catabolism dioxygenase TauD/TfdA [ <i>B.ambifaria</i> AMMD]                               |
| gj 115351920 | 10.3 | hypothetical protein Bamb_1869 [ <i>B.ambifaria</i> AMMD]                                         |
| gj 115352091 | 10.3 | UDP-N-acetylglucosamine acyltransferase [ <i>B.ambifaria</i> AMMD]                                |
| gj 115353226 | 10.3 | response regulator receiver protein [ <i>B.ambifaria</i> AMMD]                                    |
| gj 115359175 | 10.3 | ABC transporter related [ <i>B.ambifaria</i> AMMD]                                                |
| gj 116688661 | 10.3 | transketolase [ <i>B.cenocepacia</i> HI2424]                                                      |
| gj 116688778 | 10.3 | 3-methyl-2-oxobutanoate hydroxymethyltransferase [ <i>B.cenocepacia</i> HI2424]                   |
| gj 134292690 | 10.3 | protein of unknown function DUF477 [ <i>B.vietnamiensis</i> G4]                                   |
| gj 134295095 | 10.3 | electron transfer flavoprotein, alpha subunit [ <i>B.vietnamiensis</i> G4]                        |
| gj 115350921 | 10.2 | chorismate mutase [ <i>B.ambifaria</i> AMMD]                                                      |
| gj 115351953 | 10.2 | phosphoribosylformylglycinamide synthase [ <i>B.ambifaria</i> AMMD]                               |
| gj 134294696 | 10.2 | UDP-N-acetylmuramate [ <i>B.vietnamiensis</i> G4]                                                 |
| gj 134297109 | 10.2 | extracellular solute-binding protein, family 5 [ <i>B.vietnamiensis</i> G4]                       |
| gj 134297182 | 10.2 | Curli production assembly/transport component CsgG [ <i>B.vietnamiensis</i> G4]                   |
| gj 189349113 | 10.2 | outer membrane porin [ <i>B.multivorans</i> ATCC 17616]                                           |
| gj 115352409 | 10.1 | phosphoribosylglycinamide formyltransferase 2 [ <i>B.ambifaria</i> AMMD]                          |
| gj 116688507 | 10.1 | OmpA/MotB domain protein [ <i>B.cenocepacia</i> HI2424]                                           |
| gj 134292529 | 10.1 | malate synthase G [ <i>B.vietnamiensis</i> G4]                                                    |
| gj 134296656 | 10.1 | Extracellular ligand-binding receptor [ <i>B.vietnamiensis</i> G4]                                |
| gj 115350700 | 10   | chaperone protein DnaK [ <i>B.ambifaria</i> AMMD]                                                 |
| gj 115350898 | 10   | septum site-determining protein MinD [ <i>B.ambifaria</i> AMMD]                                   |
| gj 115350986 | 10   | lytic murein transglycosylase B [ <i>B.ambifaria</i> AMMD]                                        |
| gj 115351125 | 10   | NAD-dependent epimerase/dehydratase [ <i>B.ambifaria</i> AMMD]                                    |
| gj 115351879 | 10   | hydrolase, TatD family [ <i>B.ambifaria</i> AMMD]                                                 |
| gj 115352183 | 10   | dihydrodipicolinate synthase [ <i>B.ambifaria</i> AMMD]                                           |
| gj 115352608 | 10   | phosphoribosylglycinamide formyltransferase [ <i>B.ambifaria</i> AMMD]                            |
| gj 115360410 | 10   | Linocin_M18 bacteriocin protein [ <i>B.ambifaria</i> AMMD]                                        |
| gj 134290885 | 10   | Glycerone kinase [ <i>B.vietnamiensis</i> G4]                                                     |
| gj 134295835 | 10   | band 7 protein [ <i>B.vietnamiensis</i> G4]                                                       |
| gj 115351834 | 9.9  | hypothetical protein Bamb_1783 [ <i>B.ambifaria</i> AMMD]                                         |
| gj 115351945 | 9.9  | 3-hydroxyacyl-CoA dehydrogenase, NAD-binding [ <i>B.ambifaria</i> AMMD]                           |

|              |     |                                                                                                             |
|--------------|-----|-------------------------------------------------------------------------------------------------------------|
| gij115352404 | 9.9 | hypothetical protein Bamb_2353 [ <i>B.ambifaria</i> AMMD]                                                   |
| gij115360742 | 9.9 | parB-like partition proteins [ <i>B.ambifaria</i> AMMD]                                                     |
| gij134292965 | 9.9 | Polyprenyl synthetase [ <i>B.vietnamiensis</i> G4]                                                          |
| gij115350143 | 9.8 | parB-like partition proteins [ <i>B.ambifaria</i> AMMD]                                                     |
| gij115350586 | 9.8 | malic enzyme [ <i>B.ambifaria</i> AMMD]                                                                     |
| gij115351780 | 9.8 | poly(R)-hydroxyalkanoic acid synthase, class I [ <i>B.ambifaria</i> AMMD]                                   |
| gij115352575 | 9.8 | nitrite/sulfite reductase, hemoprotein beta-component, ferredoxin domain protein [ <i>B.ambifaria</i> AMMD] |
| gij115352597 | 9.8 | 4-hydroxy-3-methylbut-2-enyl diphosphate reductase [ <i>B.ambifaria</i> AMMD]                               |
| gij115353130 | 9.8 | Lytic transglycosylase, catalytic [ <i>B.ambifaria</i> AMMD]                                                |
| gij115358285 | 9.8 | phosphoenolpyruvate phosphomutase [ <i>B.ambifaria</i> AMMD]                                                |
| gij134296395 | 9.8 | aromatic amino acid aminotransferase [ <i>B.vietnamiensis</i> G4]                                           |
| gij189349395 | 9.8 | polar amino acid transport system substrate-binding protein [ <i>B.multivorans</i> ATCC 17616]              |
| gij189350331 | 9.8 | 2-oxoglutarate dehydrogenase E2 component [ <i>B.multivorans</i> ATCC 17616]                                |
| gij115350153 | 9.7 | F0F1 ATP synthase subunit beta [ <i>B.ambifaria</i> AMMD]                                                   |
| gij115350631 | 9.7 | tyrosyl-tRNA synthetase [ <i>B.ambifaria</i> AMMD]                                                          |
| gij115353212 | 9.7 | protein of unknown function DUF344 [ <i>B.ambifaria</i> AMMD]                                               |
| gij116689911 | 9.7 | ankyrin repeat protein [ <i>B.cenocepacia</i> HI2424]                                                       |
| gij134291718 | 9.7 | UspA domain protein [ <i>B.vietnamiensis</i> G4]                                                            |
| gij115350187 | 9.6 | glycine dehydrogenase [ <i>B.ambifaria</i> AMMD]                                                            |
| gij115351040 | 9.6 | ribonuclease, Rne/Rng family [ <i>B.ambifaria</i> AMMD]                                                     |
| gij134294613 | 9.6 | translation-associated GTPase [ <i>B.vietnamiensis</i> G4]                                                  |
| gij160695740 | 9.6 | ATP synthase F0, B subunit [ <i>B.mallei</i> ATCC 10399]                                                    |
| gij115351387 | 9.5 | FAD linked oxidase domain protein [ <i>B.ambifaria</i> AMMD]                                                |
| gij115352228 | 9.5 | Methenyltetrahydrofolate cyclohydrolase [ <i>B.ambifaria</i> AMMD]                                          |
| gij115359542 | 9.5 | short-chain alcohol dehydrogenase [ <i>B.ambifaria</i> AMMD]                                                |
| gij115360459 | 9.5 | 2-keto-4-pentenoate hydratase-like protein [ <i>B.ambifaria</i> AMMD]                                       |
| gij134295691 | 9.5 | cyclic peptide transporter [ <i>B.vietnamiensis</i> G4]                                                     |
| gij134296512 | 9.5 | polyhydroxyalkanoate depolymerase, intracellular [ <i>B.vietnamiensis</i> G4]                               |
| gij115358575 | 9.4 | Alcohol dehydrogenase, zinc-binding domain protein [ <i>B.ambifaria</i> AMMD]                               |
| gij115359036 | 9.4 | ABC transporter related [ <i>B.ambifaria</i> AMMD]                                                          |
| gij134294033 | 9.4 | acetate kinase [ <i>B.vietnamiensis</i> G4]                                                                 |
| gij134294740 | 9.4 | phosphogluconate dehydratase [ <i>B.vietnamiensis</i> G4]                                                   |
| gij115350692 | 9.3 | inorganic polyphosphate/ATP-NAD kinase [ <i>B.ambifaria</i> AMMD]                                           |
| gij115352162 | 9.3 | acetyl-CoA carboxylase carboxyltransferase subunit alpha [ <i>B.ambifaria</i> AMMD]                         |
| gij189349358 | 9.3 | NADP-dependent oxaloacetate-decarboxylating malate dehydrogenase [ <i>B.multivorans</i> ATCC 17616]         |
| gij115350828 | 9.2 | hypothetical protein Bamb_0774 [ <i>B.ambifaria</i> AMMD]                                                   |
| gij115353008 | 9.2 | hypothetical protein Bamb_2957 [ <i>B.ambifaria</i> AMMD]                                                   |
| gij115350587 | 9.1 | guanine-specific ribonuclease N1 and T1 [ <i>B.ambifaria</i> AMMD]                                          |
| gij115358001 | 9.1 | 1-deoxy-D-xylulose-5-phosphate synthase [ <i>B.ambifaria</i> AMMD]                                          |
| gij116691352 | 9.1 | dihydroliipoamide dehydrogenase [ <i>B.cenocepacia</i> HI2424]                                              |
| gij134292443 | 9.1 | short chain dehydrogenase [ <i>B.vietnamiensis</i> G4]                                                      |

|              |     |                                                                                                              |
|--------------|-----|--------------------------------------------------------------------------------------------------------------|
| gi 134294446 | 9.1 | 50S ribosomal protein L2 [ <i>B.vietnamiensis</i> G4]                                                        |
| gi 134295878 | 9.1 | ATPase AAA-2 domain protein [ <i>B.vietnamiensis</i> G4]                                                     |
| gi 134296384 | 9.1 | MotA/TolQ/ExbB proton channel [ <i>B.vietnamiensis</i> G4]                                                   |
| gi 189349826 | 9.1 | 3-demethylubiquinone-9 3-methyltransferase [ <i>B.multivorans</i> ATCC 17616]                                |
| gi 116688627 | 9   | acetyl-CoA carboxylase biotin carboxylase subunit [ <i>B.cenocepacia</i> HI2424]                             |
| gi 134283218 | 9   | tetratricopeptide repeat protein [ <i>B.pseudomallei</i> 305]                                                |
| gi 134296427 | 9   | NADH dehydrogenase subunit G [ <i>B.vietnamiensis</i> G4]                                                    |
| gi 134296894 | 9   | glycyl-tRNA synthetase subunit beta [ <i>B.vietnamiensis</i> G4]                                             |
| gi 83717742  | 9   | Prokaryotic protein of unknown function (DUF849) family [ <i>B.thailandensis</i> E264]                       |
| gi 115350670 | 8.9 | catalase/peroxidase HPI [ <i>B.ambifaria</i> AMMD]                                                           |
| gi 115351374 | 8.9 | valyl-tRNA synthetase [ <i>B.ambifaria</i> AMMD]                                                             |
| gi 134294789 | 8.9 | Ycel family protein [ <i>B.vietnamiensis</i> G4]                                                             |
| gi 134295336 | 8.9 | malonate decarboxylase gamma subunit [ <i>B.vietnamiensis</i> G4]                                            |
| gi 134297267 | 8.9 | two component transcriptional regulator, Fis family [ <i>B.vietnamiensis</i> G4]                             |
| gi 115351088 | 8.8 | electron transport protein SCO1/SenC [ <i>B.ambifaria</i> AMMD]                                              |
| gi 115352801 | 8.8 | transporter-associated region [ <i>B.ambifaria</i> AMMD]                                                     |
| gi 115359692 | 8.8 | toluene tolerance family protein [ <i>B.ambifaria</i> AMMD]                                                  |
| gi 134293372 | 8.8 | aminotransferase, class V [ <i>B.vietnamiensis</i> G4]                                                       |
| gi 134294243 | 8.8 | uroporphyrinogen decarboxylase [ <i>B.vietnamiensis</i> G4]                                                  |
| gi 134297210 | 8.8 | Lytic transglycosylase, catalytic [ <i>B.vietnamiensis</i> G4]                                               |
| gi 189350441 | 8.8 | LysR family Cys regulon transcriptional activator [ <i>B.multivorans</i> ATCC 17616]                         |
| gi 116688379 | 8.7 | 50S ribosomal protein L16 [ <i>B.cenocepacia</i> HI2424]                                                     |
| gi 116690575 | 8.7 | nucleotide-binding protein [ <i>B.cenocepacia</i> HI2424]                                                    |
| gi 115350519 | 8.6 | D-alanine--D-alanine ligase [ <i>B.ambifaria</i> AMMD]                                                       |
| gi 116690037 | 8.6 | ribosome recycling factor [ <i>B.cenocepacia</i> HI2424]                                                     |
| gi 134293901 | 8.6 | hydroxylamine reductase [ <i>B.vietnamiensis</i> G4]                                                         |
| gi 134296025 | 8.6 | ribosome recycling factor [ <i>B.vietnamiensis</i> G4]                                                       |
| gi 162389967 | 8.6 | glutamate synthase subunit beta [ <i>B.ambifaria</i> AMMD]                                                   |
| gi 115350483 | 8.5 | translation-associated GTPase [ <i>B.ambifaria</i> AMMD]                                                     |
| gi 115351417 | 8.5 | phenylalanyl-tRNA synthetase subunit beta [ <i>B.ambifaria</i> AMMD]                                         |
| gi 115352518 | 8.5 | bifunctional uroporphyrinogen-III synthetase/uroporphyrin-III C-methyltransferase [ <i>B.ambifaria</i> AMMD] |
| gi 115358103 | 8.5 | FoC bifunctional protein [ <i>B.ambifaria</i> AMMD]                                                          |
| gi 115360278 | 8.5 | protein of unknown function DUF883, ElaB [ <i>B.ambifaria</i> AMMD]                                          |
| gi 116693234 | 8.5 | Substrate-binding region of ABC-type glycine betaine transport system [ <i>B.cenocepacia</i> HI2424]         |
| gi 134291238 | 8.5 | HAD-superfamily hydrolase, subfamily IA, variant 3 [ <i>B.vietnamiensis</i> G4]                              |
| gi 171321248 | 8.5 | chlorinating enzyme [ <i>B.ambifaria</i> MEX-5]                                                              |
| gi 115350484 | 8.4 | hypothetical protein Bamb_0430 [ <i>B.ambifaria</i> AMMD]                                                    |
| gi 115351779 | 8.4 | acetyl-CoA acetyltransferase [ <i>B.ambifaria</i> AMMD]                                                      |
| gi 116688916 | 8.4 | Phosphomannomutase [ <i>B.cenocepacia</i> HI2424]                                                            |
| gi 116688991 | 8.4 | extracellular solute-binding protein, family 1 [ <i>B.cenocepacia</i> HI2424]                                |
| gi 189350477 | 8.4 | lysine N6-hydroxylase [ <i>B.multivorans</i> ATCC 17616]                                                     |

|              |     |                                                                                                                      |
|--------------|-----|----------------------------------------------------------------------------------------------------------------------|
| gj 115351609 | 8.3 | cobalamin biosynthesis protein CobW [ <i>B.ambifaria</i> AMMD]                                                       |
| gj 115351760 | 8.3 | ABC transporter related [ <i>B.ambifaria</i> AMMD]                                                                   |
| gj 115352533 | 8.3 | Cobyrinic acid a,c-diamide synthase [ <i>B.ambifaria</i> AMMD]                                                       |
| gj 116690911 | 8.3 | Serine-type D-Ala-D-Ala carboxypeptidase [ <i>B.cenocepacia</i> HI2424]                                              |
| gj 115350970 | 8.2 | DNA gyrase subunit A [ <i>B.ambifaria</i> AMMD]                                                                      |
| gj 116690230 | 8.2 | uncharacterized protein probably involved in high-affinity Fe <sup>2+</sup> transport [ <i>B.cenocepacia</i> HI2424] |
| gj 116691903 | 8.2 | hypothetical protein Bcen2424_3806 [ <i>B.cenocepacia</i> HI2424]                                                    |
| gj 116692965 | 8.2 | acetate kinase [ <i>B.cenocepacia</i> HI2424]                                                                        |
| gj 134294496 | 8.2 | protein of unknown function DUF1568 [ <i>B.vietnamiensis</i> G4]                                                     |
| gj 134296335 | 8.2 | hypothetical protein Bcep1808_2233 [ <i>B.vietnamiensis</i> G4]                                                      |
| gj 189351543 | 8.2 | ribose-phosphate pyrophosphokinase [ <i>B.multivorans</i> ATCC 17616]                                                |
| gj 116689635 | 8.1 | putative serine protein kinase, PrkA [ <i>B.cenocepacia</i> HI2424]                                                  |
| gj 116689842 | 8.1 | peptidase M23B [ <i>B.cenocepacia</i> HI2424]                                                                        |
| gj 134293680 | 8.1 | phosphoesterase [ <i>B.vietnamiensis</i> G4]                                                                         |
| gj 134295949 | 8.1 | phosphoribosylformylglycinamide synthase [ <i>B.vietnamiensis</i> G4]                                                |
| gj 161648989 | 8.1 | bifunctional aconitate hydratase 2/2-methylisocitrate dehydratase [ <i>B.vietnamiensis</i> G4]                       |
| gj 189348076 | 8.1 | branched-chain amino acid transport system substrate-binding protein [ <i>B.multivorans</i> ATCC 17616]              |
| gj 115351412 | 8   | threonyl-tRNA synthetase [ <i>B.ambifaria</i> AMMD]                                                                  |
| gj 116690124 | 8   | transferase hexapeptide repeat containing protein [ <i>B.cenocepacia</i> HI2424]                                     |
| gj 134293745 | 8   | aldo/keto reductase [ <i>B.vietnamiensis</i> G4]                                                                     |
| gj 134294440 | 8   | elongation factor G [ <i>B.vietnamiensis</i> G4]                                                                     |
| gj 134296487 | 8   | hypothetical protein Bcep1808_2388 [ <i>B.vietnamiensis</i> G4]                                                      |
| gj 115351442 | 7.9 | GTP-binding protein TypA [ <i>B.ambifaria</i> AMMD]                                                                  |
| gj 115352668 | 7.9 | Cyclopropane-fatty-acyl-phospholipid synthase [ <i>B.ambifaria</i> AMMD]                                             |
| gj 115357996 | 7.9 | Carboxymethylenebutenolidase [ <i>B.ambifaria</i> AMMD]                                                              |
| gj 116690819 | 7.9 | Tetratricopeptide TPR_2 repeat protein [ <i>B.cenocepacia</i> HI2424]                                                |
| gj 83721398  | 7.9 | isocitrate dehydrogenase [ <i>B.thailandensis</i> E264]                                                              |
| gj 115352994 | 7.8 | Serine-type D-Ala-D-Ala carboxypeptidase [ <i>B.ambifaria</i> AMMD]                                                  |
| gj 116690492 | 7.8 | sulfate adenyltransferase subunit 2 [ <i>B.cenocepacia</i> HI2424]                                                   |
| gj 134294441 | 7.8 | elongation factor Tu [ <i>B.vietnamiensis</i> G4]                                                                    |
| gj 134294998 | 7.8 | ABC transporter related [ <i>B.vietnamiensis</i> G4]                                                                 |
| gj 160695879 | 7.8 | translation elongation factor Tu [ <i>B.mallei</i> ATCC 10399]                                                       |
| gj 115351634 | 7.7 | Glutathione S-transferase, N-terminal domain [ <i>B.ambifaria</i> AMMD]                                              |
| gj 115351852 | 7.7 | polysaccharide deacetylase [ <i>B.ambifaria</i> AMMD]                                                                |
| gj 115353079 | 7.7 | UDP-N-acetylglucosamine pyrophosphorylase [ <i>B.ambifaria</i> AMMD]                                                 |
| gj 115359630 | 7.7 | PRC-barrel domain protein [ <i>B.ambifaria</i> AMMD]                                                                 |
| gj 116693806 | 7.7 | 3-hydroxybutyrate dehydrogenase [ <i>B.cenocepacia</i> HI2424]                                                       |
| gj 134296402 | 7.7 | hypothetical protein Bcep1808_2303 [ <i>B.vietnamiensis</i> G4]                                                      |
| gj 171319800 | 7.7 | OmpW family protein [ <i>B.ambifaria</i> MEX-5]                                                                      |
| gj 189348250 | 7.7 | conserved hypothetical protein [ <i>B.multivorans</i> ATCC 17616]                                                    |
| gj 189349365 | 7.7 | glyceraldehyde 3-phosphate dehydrogenase [ <i>B.multivorans</i>                                                      |



|              |     |                                                                                                   |
|--------------|-----|---------------------------------------------------------------------------------------------------|
|              |     | ATCC 17616]                                                                                       |
| gj 115351220 | 7.6 | carbamoyl phosphate synthase small subunit [ <i>B.ambifaria</i> AMMD]                             |
| gj 115353019 | 7.6 | arginyl-tRNA synthetase [ <i>B.ambifaria</i> AMMD]                                                |
| gj 134294686 | 7.6 | 17 kDa surface antigen [ <i>B.vietnamiensis</i> G4]                                               |
| gj 171315488 | 7.6 | conserved hypothetical protein [ <i>B.ambifaria</i> MEX-5]                                        |
| gj 83655611  | 7.6 | DNA gyrase subunit B [ <i>B.cepacia</i> ]                                                         |
| gj 115351375 | 7.5 | UvrD/REP helicase [ <i>B.ambifaria</i> AMMD]                                                      |
| gj 115352097 | 7.5 | 1-deoxy-D-xylulose 5-phosphate reductoisomerase [ <i>B.ambifaria</i> AMMD]                        |
| gj 115353020 | 7.5 | Sporulation domain protein [ <i>B.ambifaria</i> AMMD]                                             |
| gj 115358719 | 7.5 | protein of unknown function DUF1255 [ <i>B.ambifaria</i> AMMD]                                    |
| gj 134295026 | 7.5 | hypothetical protein Bcep1808_0915 [ <i>B.vietnamiensis</i> G4]                                   |
| gj 134296323 | 7.5 | Oligopeptidase A [ <i>B.vietnamiensis</i> G4]                                                     |
| gj 37654966  | 7.5 | flagellin [ <i>B.vietnamiensis</i> ]                                                              |
| gj 115360893 | 7.4 | hypothetical protein Bamb_6152 [ <i>B.ambifaria</i> AMMD]                                         |
| gj 116688419 | 7.4 | glycerol-3-phosphate transporter periplasmic binding protein [ <i>B.cenocepacia</i> HI2424]       |
| gj 116688912 | 7.4 | UDP-glucose 4-epimerase [ <i>B.cenocepacia</i> HI2424]                                            |
| gj 116689825 | 7.4 | HflC protein [ <i>B.cenocepacia</i> HI2424]                                                       |
| gj 134294934 | 7.4 | UDP-glucose 4-epimerase [ <i>B.vietnamiensis</i> G4]                                              |
| gj 134296917 | 7.4 | 3-hydroxyacyl-CoA dehydrogenase, NAD-binding [ <i>B.vietnamiensis</i> G4]                         |
| gj 189349328 | 7.4 | adenosine kinase [ <i>B.multivorans</i> ATCC 17616]                                               |
| gj 115351564 | 7.3 | hypothetical protein Bamb_1511 [ <i>B.ambifaria</i> AMMD]                                         |
| gj 115352122 | 7.3 | alanine racemase [ <i>B.ambifaria</i> AMMD]                                                       |
| gj 134291841 | 7.3 | Alcohol dehydrogenase, zinc-binding domain protein [ <i>B.vietnamiensis</i> G4]                   |
| gj 134292247 | 7.3 | peptidase S10, serine carboxypeptidase [ <i>B.vietnamiensis</i> G4]                               |
| gj 134294413 | 7.3 | malic enzyme [ <i>B.vietnamiensis</i> G4]                                                         |
| gj 134295901 | 7.3 | 50S ribosomal protein L9 [ <i>B.vietnamiensis</i> G4]                                             |
| gj 134296406 | 7.3 | peptidase M14, carboxypeptidase A [ <i>B.vietnamiensis</i> G4]                                    |
| gj 134296605 | 7.3 | HemY domain protein [ <i>B.vietnamiensis</i> G4]                                                  |
| gj 171318106 | 7.3 | ribosomal protein S2 [ <i>B.ambifaria</i> MEX-5]                                                  |
| gj 189349608 | 7.3 | phosphomannomutase [ <i>B.multivorans</i> ATCC 17616]                                             |
| gj 189351043 | 7.3 | polyribonucleotide nucleotidyltransferase [ <i>B.multivorans</i> ATCC 17616]                      |
| gj 83719268  | 7.3 | acetyl-CoA reductase [ <i>B.thailandensis</i> E264]                                               |
| gj 115350400 | 7.2 | imidazoleglycerol-phosphate dehydratase [ <i>B.ambifaria</i> AMMD]                                |
| gj 115350681 | 7.2 | globin [ <i>B.ambifaria</i> AMMD]                                                                 |
| gj 115351858 | 7.2 | replicative DNA helicase [ <i>B.ambifaria</i> AMMD]                                               |
| gj 115352798 | 7.2 | PhoH family protein [ <i>B.ambifaria</i> AMMD]                                                    |
| gj 115358567 | 7.2 | UspA domain protein [ <i>B.ambifaria</i> AMMD]                                                    |
| gj 115359753 | 7.2 | transcriptional regulator, Crp/Fnr family [ <i>B.ambifaria</i> AMMD]                              |
| gj 116690135 | 7.2 | lipoprotein releasing system, transmembrane protein, LolC/E family [ <i>B.cenocepacia</i> HI2424] |
| gj 116690544 | 7.2 | isocitrate dehydrogenase [ <i>B.cenocepacia</i> HI2424]                                           |
| gj 134294357 | 7.2 | histone family protein nucleoid-structuring protein H-NS [ <i>B.vietnamiensis</i> G4]             |
| gj 134294509 | 7.2 | toluene tolerance family protein [ <i>B.vietnamiensis</i> G4]                                     |
| gj 171321751 | 7.2 | branched-chain amino acid aminotransferase [ <i>B.ambifaria</i> MEX-                              |

|              |     |                                                                                                                             |
|--------------|-----|-----------------------------------------------------------------------------------------------------------------------------|
|              |     | 5]                                                                                                                          |
| gj 189351140 | 7.2 | YjgF family putative translation initiation inhibitor [ <i>B.multivorans</i> ATCC 17616]                                    |
| gj 189351606 | 7.2 | carboxy-terminal protease [ <i>B.multivorans</i> ATCC 17616]                                                                |
| gj 115352093 | 7.1 | UDP-3-O-[3-hydroxymyristoyl] glucosamine N-acyltransferase [ <i>B.ambifaria</i> AMMD]                                       |
| gj 116688482 | 7.1 | extracellular solute-binding protein, family 3 [ <i>B.cenocepacia</i> HI2424]                                               |
| gj 116688695 | 7.1 | ABC transporter related [ <i>B.cenocepacia</i> HI2424]                                                                      |
| gj 116689202 | 7.1 | bifunctional N-succinyldiaminopimelate-aminotransferase/acetylornithine transaminase protein [ <i>B.cenocepacia</i> HI2424] |
| gj 134293099 | 7.1 | aconitate hydratase [ <i>B.vietnamiensis</i> G4]                                                                            |
| gj 134294561 | 7.1 | extracellular solute-binding protein, family 3 [ <i>B.vietnamiensis</i> G4]                                                 |
| gj 134295581 | 7.1 | GTP-binding protein TypA [ <i>B.vietnamiensis</i> G4]                                                                       |
| gj 53718021  | 7.1 | thiol:disulfide interchange protein [ <i>B.pseudomallei</i> K96243]                                                         |
| gj 91779712  | 7.1 | thiol:disulfide interchange protein [ <i>B.pseudomallei</i> K96243]                                                         |
| gj 91779712  | 7.1 | 3-hydroxybutyryl-CoA dehydrogenase [ <i>B.xenovorans</i> LB400]                                                             |
| gj 115353232 | 7   | methionyl-tRNA formyltransferase [ <i>B.ambifaria</i> AMMD]                                                                 |
| gj 116690430 | 7   | outer membrane protein (porin)-like protein [ <i>B.cenocepacia</i> HI2424]                                                  |
| gj 116691071 | 7   | Ferredoxin--NADP(+) reductase [ <i>B.cenocepacia</i> HI2424]                                                                |
| gj 134296431 | 7   | NADH dehydrogenase subunit C [ <i>B.vietnamiensis</i> G4]                                                                   |
| gj 134297221 | 7   | extracellular solute-binding protein, family 5 [ <i>B.vietnamiensis</i> G4]                                                 |
| gj 115350968 | 6.9 | 3-demethylubiquinone-9 3-methyltransferase [ <i>B.ambifaria</i> AMMD]                                                       |
| gj 134293406 | 6.9 | extracellular solute-binding protein, family 5 [ <i>B.vietnamiensis</i> G4]                                                 |
| gj 134295074 | 6.9 | phosphoserine aminotransferase [ <i>B.vietnamiensis</i> G4]                                                                 |
| gj 134296619 | 6.9 | methionyl-tRNA synthetase [ <i>B.vietnamiensis</i> G4]                                                                      |
| gj 134296902 | 6.9 | PpiC-type peptidyl-prolyl cis-trans isomerase [ <i>B.vietnamiensis</i> G4]                                                  |
| gj 134297080 | 6.9 | Serine-type D-Ala-D-Ala carboxypeptidase [ <i>B.vietnamiensis</i> G4]                                                       |
| gj 171322437 | 6.9 | extracellular solute-binding protein family 5 [ <i>B.ambifaria</i> MEX-5]                                                   |
| gj 189350585 | 6.9 | acetoacetyl-CoA reductase [ <i>B.multivorans</i> ATCC 17616]                                                                |
| gj 189352638 | 6.9 | citrate synthase [ <i>B.multivorans</i> ATCC 17616]                                                                         |
| gj 83720868  | 6.9 | Phage integrase [ <i>B.thailandensis</i> E264]                                                                              |
| gj 115350493 | 6.8 | anthranilate synthase component I [ <i>B.ambifaria</i> AMMD]                                                                |
| gj 115351843 | 6.8 | homoserine dehydrogenase [ <i>B.ambifaria</i> AMMD]                                                                         |
| gj 115360899 | 6.8 | acetyl-CoA synthetase [ <i>B.ambifaria</i> AMMD]                                                                            |
| gj 116688387 | 6.8 | 50S ribosomal protein L6 [ <i>B.cenocepacia</i> HI2424]                                                                     |
| gj 116692004 | 6.8 | 6-phosphogluconate dehydrogenase [ <i>B.cenocepacia</i> HI2424]                                                             |
| gj 134295094 | 6.8 | electron transfer flavoprotein beta-subunit [ <i>B.vietnamiensis</i> G4]                                                    |
| gj 83716265  | 6.8 | thiotemplate mechanism natural product synthetase [ <i>B.thailandensis</i> E264]                                            |
| gj 134294455 | 6.7 | 50S ribosomal protein L5 [ <i>B.vietnamiensis</i> G4]                                                                       |
| gj 134294850 | 6.7 | serine hydroxymethyltransferase [ <i>B.vietnamiensis</i> G4]                                                                |
| gj 134296376 | 6.7 | acetyl-CoA synthetase [ <i>B.vietnamiensis</i> G4]                                                                          |
| gj 115351565 | 6.6 | hypothetical protein Bamb_1512 [ <i>B.ambifaria</i> AMMD]                                                                   |
| gj 134294675 | 6.6 | prolyl-tRNA synthetase [ <i>B.vietnamiensis</i> G4]                                                                         |
| gj 134295936 | 6.6 | polymorphic outer membrane protein [ <i>B.vietnamiensis</i> G4]                                                             |
| gj 134296437 | 6.6 | polynucleotide phosphorylase/polyadenylase [ <i>B.vietnamiensis</i> G4]                                                     |

|              |     |                                                                                                                   |
|--------------|-----|-------------------------------------------------------------------------------------------------------------------|
| gij160696872 | 6.6 | GTP-binding protein YchF [ <i>B.mallei</i> ATCC 10399]                                                            |
| gij115352527 | 6.5 | argininosuccinate lyase [ <i>B.ambifaria</i> AMMD]                                                                |
| gij115358985 | 6.5 | Carbohydrate-selective porin OprB [ <i>B.ambifaria</i> AMMD]                                                      |
| gij116690646 | 6.5 | fructose-1,6-bisphosphate aldolase [ <i>B.cenocepacia</i> HI2424]                                                 |
| gij134295557 | 6.5 | hypothetical protein Bcep1808_1449 [ <i>B.vietnamiensis</i> G4]                                                   |
| gij134295958 | 6.5 | ATP-dependent Clp protease proteolytic subunit [ <i>B.vietnamiensis</i> G4]                                       |
| gij83718546  | 6.5 | 3-hydroxyacyl-CoA dehydrogenase/enoyl-CoA hydratase/isomerase family protein [ <i>B.thailandensis</i> E264]       |
| gij115350547 | 6.4 | signal recognition particle protein [ <i>B.ambifaria</i> AMMD]                                                    |
| gij115351062 | 6.4 | GTP-binding protein LepA [ <i>B.ambifaria</i> AMMD]                                                               |
| gij115351485 | 6.4 | type II secretion system protein [ <i>B.ambifaria</i> AMMD]                                                       |
| gij115358766 | 6.4 | extracellular solute-binding protein, family 5 [ <i>B.ambifaria</i> AMMD]                                         |
| gij115359376 | 6.4 | aldehyde dehydrogenase [ <i>B.ambifaria</i> AMMD]                                                                 |
| gij116688128 | 6.4 | F0F1 ATP synthase subunit alpha [ <i>B.cenocepacia</i> HI2424]                                                    |
| gij134296316 | 6.4 | phasin family protein [ <i>B.vietnamiensis</i> G4]                                                                |
| gij134296330 | 6.4 | glutamine synthetase, type I [ <i>B.vietnamiensis</i> G4]                                                         |
| gij91781310  | 6.4 | ABC branched chain amino acid family transporter, periplasmic ligand binding protein [ <i>B.xenovorans</i> LB400] |
| gij91784774  | 6.4 | Microcin-processing peptidase [ <i>B.xenovorans</i> LB400]                                                        |
| gij115350701 | 6.3 | chaperone protein DnaJ [ <i>B.ambifaria</i> AMMD]                                                                 |
| gij115350737 | 6.3 | serine hydroxymethyltransferase [ <i>B.ambifaria</i> AMMD]                                                        |
| gij116690345 | 6.3 | polyhydroxyalkanoate depolymerase, intracellular [ <i>B.cenocepacia</i> HI2424]                                   |
| gij167838193 | 6.3 | 50S ribosomal protein L15 [ <i>B.thailandensis</i> MSMB43]                                                        |
| gij171320789 | 6.3 | trigger factor [ <i>B.ambifaria</i> MEX-5]                                                                        |
| gij189350986 | 6.3 | bacterioferritin [ <i>B.multivorans</i> ATCC 17616]                                                               |
| gij189351783 | 6.3 | large subunit ribosomal protein L6 [ <i>B.multivorans</i> ATCC 17616]                                             |
| gij115350342 | 6.2 | preprotein translocase subunit SecY [ <i>B.ambifaria</i> AMMD]                                                    |
| gij116686681 | 6.2 | hypothetical protein Bcen2424_6303 [ <i>B.cenocepacia</i> HI2424]                                                 |
| gij116693836 | 6.2 | GTP cyclohydrolase I [ <i>B.cenocepacia</i> HI2424]                                                               |
| gij134291711 | 6.2 | beta-lactamase domain protein [ <i>B.vietnamiensis</i> G4]                                                        |
| gij134296319 | 6.2 | pyruvate dehydrogenase subunit E1 [ <i>B.vietnamiensis</i> G4]                                                    |
| gij83716594  | 6.2 | nonribosomal peptide synthetase, putative [ <i>B.thailandensis</i> E264]                                          |
| gij91781882  | 6.2 | Putative heat shock protein [ <i>B.xenovorans</i> LB400]                                                          |
| gij100917445 | 6.1 | hypothetical protein Bmal10_03001194 [ <i>B.mallei</i> 10399]                                                     |
| gij115350367 | 6.1 | 3-dehydroquinate synthase [ <i>B.ambifaria</i> AMMD]                                                              |
| gij115352588 | 6.1 | CDP-6-deoxy-delta-3,4-glucoseen reductase [ <i>B.ambifaria</i> AMMD]                                              |
| gij115359631 | 6.1 | phospho-2-dehydro-3-deoxyheptonate aldolase [ <i>B.ambifaria</i> AMMD]                                            |
| gij116690050 | 6.1 | hypothetical protein Bcen2424_2029 [ <i>B.cenocepacia</i> HI2424]                                                 |
| gij134293374 | 6.1 | phosphoenolpyruvate phosphomutase [ <i>B.vietnamiensis</i> G4]                                                    |
| gij134295708 | 6.1 | cobalamin biosynthesis protein CobW [ <i>B.vietnamiensis</i> G4]                                                  |
| gij134296028 | 6.1 | 30S ribosomal protein S2 [ <i>B.vietnamiensis</i> G4]                                                             |
| gij134296086 | 6.1 | peptidyl-prolyl cis-trans isomerase, cyclophilin type [ <i>B.vietnamiensis</i> G4]                                |
| gij160698114 | 6.1 | argininosuccinate synthase [ <i>B.mallei</i> ATCC 10399]                                                          |
| gij189349421 | 6.1 | X-Pro aminopeptidase [ <i>B.multivorans</i> ATCC 17616]                                                           |
| gij91778430  | 6.1 | Methylpurine-DNA glycosylase (MPG) [ <i>B.xenovorans</i> LB400]                                                   |
| gij116688683 | 6   | phosphogluconate dehydratase [ <i>B.cenocepacia</i> HI2424]                                                       |

|              |     |                                                                                           |
|--------------|-----|-------------------------------------------------------------------------------------------|
| gij116690356 | 6   | transaldolase B [ <i>B.cenocepacia</i> HI2424]                                            |
| gij134292355 | 6   | short-chain alcohol dehydrogenase [ <i>B.vietnamiensis</i> G4]                            |
| gij134294652 | 6   | cell division protein FtsZ [ <i>B.vietnamiensis</i> G4]                                   |
| gij134294842 | 6   | hypothetical protein Bcep1808_0730 [ <i>B.vietnamiensis</i> G4]                           |
| gij115350606 | 5.9 | gamma-glutamyl phosphate reductase [ <i>B.ambifaria</i> AMMD]                             |
| gij115350624 | 5.9 | dihydroorotase [ <i>B.ambifaria</i> AMMD]                                                 |
| gij116690628 | 5.9 | transporter, hydrophobe/amphiphile efflux-1 (HAE1) family [ <i>B.cenocepacia</i> HI2424]  |
| gij134295442 | 5.9 | helix-turn-helix- domain containing protein, AraC type [ <i>B.vietnamiensis</i> G4]       |
| gij134296193 | 5.9 | hypothetical protein Bcep1808_2091 [ <i>B.vietnamiensis</i> G4]                           |
| gij115360195 | 5.8 | argininosuccinate synthase [ <i>B.ambifaria</i> AMMD]                                     |
| gij116688126 | 5.8 | F0F1 ATP synthase subunit B [ <i>B.cenocepacia</i> HI2424]                                |
| gij116689113 | 5.8 | fumarate hydratase [ <i>B.cenocepacia</i> HI2424]                                         |
| gij116690115 | 5.8 | uncharacterized lipoprotein [ <i>B.cenocepacia</i> HI2424]                                |
| gij134296317 | 5.8 | dihydroliipoamide dehydrogenase [ <i>B.vietnamiensis</i> G4]                              |
| gij189351795 | 5.8 | large subunit ribosomal protein L2 [ <i>B.multivorans</i> ATCC 17616]                     |
| gij189353570 | 5.8 | deacylase [ <i>B.multivorans</i> ATCC 17616]                                              |
| gij115352928 | 5.7 | cytochrome bd ubiquinol oxidase, subunit I [ <i>B.ambifaria</i> AMMD]                     |
| gij115358106 | 5.7 | amidophosphoribosyltransferase [ <i>B.ambifaria</i> AMMD]                                 |
| gij115358899 | 5.7 | NADH:flavin oxidoreductase/NADH oxidase [ <i>B.ambifaria</i> AMMD]                        |
| gij115360051 | 5.7 | molecular chaperone-like protein [ <i>B.ambifaria</i> AMMD]                               |
| gij116692007 | 5.7 | peptidase M23B [ <i>B.cenocepacia</i> HI2424]                                             |
| gij134292973 | 5.7 | RNA polymerase sigma factor RpoD [ <i>B.vietnamiensis</i> G4]                             |
| gij134294473 | 5.7 | delta-aminolevulinic acid dehydratase [ <i>B.vietnamiensis</i> G4]                        |
| gij134294747 | 5.7 | extracellular solute-binding protein, family 3 [ <i>B.vietnamiensis</i> G4]               |
| gij134295582 | 5.7 | alpha-ketoglutarate decarboxylase [ <i>B.vietnamiensis</i> G4]                            |
| gij189349477 | 5.7 | molecular chaperone [ <i>B.multivorans</i> ATCC 17616]                                    |
| gij91780922  | 5.7 | hypothetical protein Bxe_C0904 [ <i>B.xenovorans</i> LB400]                               |
| gij115350875 | 5.6 | riboflavin biosynthesis protein RibD [ <i>B.ambifaria</i> AMMD]                           |
| gij115351466 | 5.6 | RNA chaperone Hfq [ <i>B.ambifaria</i> AMMD]                                              |
| gij115352535 | 5.6 | methionyl-tRNA synthetase [ <i>B.ambifaria</i> AMMD]                                      |
| gij115360740 | 5.6 | hypothetical protein Bamb_5999 [ <i>B.ambifaria</i> AMMD]                                 |
| gij116688994 | 5.6 | ABC transporter related [ <i>B.cenocepacia</i> HI2424]                                    |
| gij134292217 | 5.6 | TonB-dependent siderophore receptor [ <i>B.vietnamiensis</i> G4]                          |
| gij134296443 | 5.6 | 2-isopropylmalate synthase [ <i>B.vietnamiensis</i> G4]                                   |
| gij134296805 | 5.6 | periplasmic solute binding protein [ <i>B.vietnamiensis</i> G4]                           |
| gij189348710 | 5.6 | putative universal stress protein [ <i>B.multivorans</i> ATCC 17616]                      |
| gij189351944 | 5.6 | F-type H <sup>+</sup> -transporting ATPase delta chain [ <i>B.multivorans</i> ATCC 17616] |
| gij91781739  | 5.6 | single-strand DNA-binding protein [ <i>B.xenovorans</i> LB400]                            |
| gij115359710 | 5.5 | Cobyrinic acid a,c-diamide synthase [ <i>B.ambifaria</i> AMMD]                            |
| gij116688362 | 5.5 | 50S ribosomal protein L10 [ <i>B.cenocepacia</i> HI2424]                                  |
| gij134294891 | 5.5 | hypothetical protein Bcep1808_0779 [ <i>B.vietnamiensis</i> G4]                           |
| gij134295459 | 5.5 | cellulose synthase regulator protein [ <i>B.vietnamiensis</i> G4]                         |
| gij134296504 | 5.5 | DEAD/DEAH box helicase domain protein [ <i>B.vietnamiensis</i> G4]                        |
| gij171318173 | 5.5 | protein of unknown function DUF306 Meta and HslJ [ <i>B.ambifaria</i> MEX-5]              |
| gij189351808 | 5.5 | large subunit ribosomal protein L10 [ <i>B.multivorans</i> ATCC 17616]                    |

|              |     |                                                                                                                          |
|--------------|-----|--------------------------------------------------------------------------------------------------------------------------|
| gj 189352627 | 5.5 | aconitate hydratase 1 [ <i>B.multivorans</i> ATCC 17616]                                                                 |
| gj 115359586 | 5.4 | methylcitrate synthase [ <i>B.ambifaria</i> AMMD]                                                                        |
| gj 115359622 | 5.4 | Radical SAM domain protein [ <i>B.ambifaria</i> AMMD]                                                                    |
| gj 116690722 | 5.4 | glycyl-tRNA synthetase subunit beta [ <i>B.cenocepacia</i> HI2424]                                                       |
| gj 160696708 | 5.4 | aspartate carbamoyltransferase, 44 kDa non-catalytic chain [ <i>B.mallei</i> ATCC 10399]                                 |
| gj 70779411  | 5.4 | TraL [ <i>B.cepacia</i> ]                                                                                                |
| gj 83717138  | 5.4 | JamP [ <i>B.thailandensis</i> E264]                                                                                      |
| gj 83720213  | 5.4 | polyketide synthase [ <i>B.thailandensis</i> E264]                                                                       |
| gj 91777827  | 5.4 | methylcitrate synthase [ <i>B.xenovorans</i> LB400]                                                                      |
| gj 115351370 | 5.3 | Peptidoglycan-binding LysM [ <i>B.ambifaria</i> AMMD]                                                                    |
| gj 115352823 | 5.3 | 3-hydroxyacyl-CoA dehydrogenase, NAD-binding [ <i>B.ambifaria</i> AMMD]                                                  |
| gj 134291080 | 5.3 | nitrate reductase, alpha subunit [ <i>B.vietnamiensis</i> G4]                                                            |
| gj 189349528 | 5.3 | glycine hydroxymethyltransferase [ <i>B.multivorans</i> ATCC 17616]                                                      |
| gj 115359463 | 5.2 | beta-ketoadipyl CoA thiolase [ <i>B.ambifaria</i> AMMD]                                                                  |
| gj 116688714 | 5.2 | bifunctional phosphoribosylaminoimidazolecarboxamide formyltransferase/IMP cyclohydrolase [ <i>B.cenocepacia</i> HI2424] |
| gj 116690158 | 5.2 | pyruvate dehydrogenase subunit E1 [ <i>B.cenocepacia</i> HI2424]                                                         |
| gj 115352932 | 5.1 | PTS system, N-acetylglucosamine-specific IIBC subunit [ <i>B.ambifaria</i> AMMD]                                         |
| gj 115358564 | 5.1 | UspA domain protein [ <i>B.ambifaria</i> AMMD]                                                                           |
| gj 116690456 | 5.1 | OmpA/MotB domain protein [ <i>B.cenocepacia</i> HI2424]                                                                  |
| gj 134292248 | 5.1 | peptidase S8 and S53, subtilisin, kexin, sedolisin [ <i>B.vietnamiensis</i> G4]                                          |
| gj 134296608 | 5.1 | phosphoenolpyruvate carboxylase [ <i>B.vietnamiensis</i> G4]                                                             |
| gj 160698040 | 5.1 | conserved hypothetical protein [ <i>B.mallei</i> ATCC 10399]                                                             |
| gj 171320670 | 5.1 | MltA-interacting MipA family protein [ <i>B.ambifaria</i> MEX-5]                                                         |
| gj 171321799 | 5.1 | peptidase M48 Ste24p [ <i>B.ambifaria</i> MEX-5]                                                                         |
| gj 115350368 | 5   | deoxyguanosinetriphosphate triphosphohydrolase-like protein [ <i>B.ambifaria</i> AMMD]                                   |
| gj 115351699 | 5   | hypothetical protein Bamb_1647 [ <i>B.ambifaria</i> AMMD]                                                                |
| gj 115352805 | 5   | glycyl-tRNA synthetase subunit beta [ <i>B.ambifaria</i> AMMD]                                                           |
| gj 116688138 | 5   | Extracellular ligand-binding receptor [ <i>B.cenocepacia</i> HI2424]                                                     |
| gj 171318238 | 5   | carbamoyl-phosphate synthase, small subunit [ <i>B.ambifaria</i> MEX-5]                                                  |
| gj 189350717 | 5   | peptidyl-prolyl cis-trans isomerase D [ <i>B.multivorans</i> ATCC 17616]                                                 |
| gj 189351544 | 5   | large subunit ribosomal protein L25 [ <i>B.multivorans</i> ATCC 17616]                                                   |
| gj 83720370  | 5   | pmbA protein [ <i>B.thailandensis</i> E264]                                                                              |
| gj 115360290 | 4.9 | UDP-glucose 6-dehydrogenase [ <i>B.ambifaria</i> AMMD]                                                                   |
| gj 115360454 | 4.9 | nitrate reductase, beta subunit [ <i>B.ambifaria</i> AMMD]                                                               |
| gj 116690740 | 4.9 | 3-hydroxyacyl-CoA dehydrogenase, NAD-binding [ <i>B.cenocepacia</i> HI2424]                                              |
| gj 116690337 | 4.8 | DEAD/DEAH box helicase domain protein [ <i>B.cenocepacia</i> HI2424]                                                     |
| gj 160697011 | 4.8 | hippurate hydrolase [ <i>B.mallei</i> ATCC 10399]                                                                        |
| gj 171320062 | 4.8 | transketolase [ <i>B.ambifaria</i> MEX-5]                                                                                |
| gj 2935157   | 4.8 | type I flagellin [ <i>B.cepacia</i> ]                                                                                    |
| gj 115352311 | 4.7 | peptidase M14, carboxypeptidase A [ <i>B.ambifaria</i> AMMD]                                                             |
| gj 116690367 | 4.7 | heat shock protein 90 [ <i>B.cenocepacia</i> HI2424]                                                                     |

|              |     |                                                                                                  |
|--------------|-----|--------------------------------------------------------------------------------------------------|
| gj 171319798 | 4.7 | extracellular solute-binding protein family 1 [ <i>B.ambifaria</i> MEX-5]                        |
| gj 189349662 | 4.7 | conserved hypothetical protein [ <i>B.multivorans</i> ATCC 17616]                                |
| gj 189351516 | 4.7 | phasin family protein [ <i>B.multivorans</i> ATCC 17616]                                         |
| gj 91778564  | 4.7 | Alkanesulfonate monooxygenase [ <i>B.xenovorans</i> LB400]                                       |
| gj 115358074 | 4.6 | Glutathione S-transferase, C-terminal domain [ <i>B.ambifaria</i> AMMD]                          |
| gj 115360514 | 4.6 | 3-hydroxybutyryl-CoA dehydrogenase [ <i>B.ambifaria</i> AMMD]                                    |
| gj 116686519 | 4.6 | porin, Gram-negative type [ <i>B.cenocepacia</i> HI2424]                                         |
| gj 116690937 | 4.6 | arginyl-tRNA synthetase [ <i>B.cenocepacia</i> HI2424]                                           |
| gj 134291715 | 4.6 | Poly-beta-hydroxybutyrate polymerase domain protein [ <i>B.vietnamiensis</i> G4]                 |
| gj 134295552 | 4.6 | phenylalanyl-tRNA synthetase subunit beta [ <i>B.vietnamiensis</i> G4]                           |
| gj 134295886 | 4.6 | aminotransferase AlaT [ <i>B.vietnamiensis</i> G4]                                               |
| gj 134296379 | 4.6 | hydro-lyases, Fe-S type, tartrate/fumarate subfamily, alpha subunit [ <i>B.vietnamiensis</i> G4] |
| gj 189351992 | 4.6 | 3-hydroxybutyrate dehydrogenase [ <i>B.multivorans</i> ATCC 17616]                               |
| gj 189353469 | 4.6 | 3-oxoacyl-[acyl-carrier protein] reductase [ <i>B.multivorans</i> ATCC 17616]                    |
| gj 115350320 | 4.5 | elongation factor Tu [ <i>B.ambifaria</i> AMMD]                                                  |
| gj 115350432 | 4.5 | protein of unknown function DUF876 [ <i>B.ambifaria</i> AMMD]                                    |
| gj 115351218 | 4.5 | Lytic transglycosylase, catalytic [ <i>B.ambifaria</i> AMMD]                                     |
| gj 116689850 | 4.5 | transcription termination factor Rho [ <i>B.cenocepacia</i> HI2424]                              |
| gj 134294256 | 4.5 | Conserved TM helix repeat-containing protein [ <i>B.vietnamiensis</i> G4]                        |
| gj 134296813 | 4.5 | transporter, hydrophobe/amphiphile efflux-1 (HAE1) family [ <i>B.vietnamiensis</i> G4]           |
| gj 115350603 | 4.4 | leucyl-tRNA synthetase [ <i>B.ambifaria</i> AMMD]                                                |
| gj 115351149 | 4.4 | amino acid permease-associated region [ <i>B.ambifaria</i> AMMD]                                 |
| gj 134290981 | 4.4 | methyl-accepting chemotaxis sensory transducer [ <i>B.vietnamiensis</i> G4]                      |
| gj 134294992 | 4.4 | glucokinase [ <i>B.vietnamiensis</i> G4]                                                         |
| gj 134295571 | 4.4 | pseudouridine synthase [ <i>B.vietnamiensis</i> G4]                                              |
| gj 37654970  | 4.4 | flagellin [ <i>B.cepacia</i> ]                                                                   |
| gj 83720413  | 4.4 | lipoprotein, putative [ <i>B.thailandensis</i> E264]                                             |
| gj 116690130 | 4.3 | CTP synthetase [ <i>B.cenocepacia</i> HI2424]                                                    |
| gj 134291725 | 4.3 | Alcohol dehydrogenase GroES domain protein [ <i>B.vietnamiensis</i> G4]                          |
| gj 189352477 | 4.3 | 1-deoxy-D-xylulose-5-phosphate synthase [ <i>B.multivorans</i> ATCC 17616]                       |
| gj 115350664 | 4.2 | preprotein translocase subunit SecD [ <i>B.ambifaria</i> AMMD]                                   |
| gj 115351432 | 4.2 | Pseudouridine synthase, Rsu [ <i>B.ambifaria</i> AMMD]                                           |
| gj 116689522 | 4.2 | translation initiation factor IF-2 [ <i>B.cenocepacia</i> HI2424]                                |
| gj 116690446 | 4.2 | phosphoenolpyruvate carboxylase [ <i>B.cenocepacia</i> HI2424]                                   |
| gj 116690486 | 4.2 | leucyl aminopeptidase [ <i>B.cenocepacia</i> HI2424]                                             |
| gj 134295141 | 4.2 | ribonuclease, Rne/Rng family [ <i>B.vietnamiensis</i> G4]                                        |
| gj 134297014 | 4.2 | cytochrome d ubiquinol oxidase, subunit II [ <i>B.vietnamiensis</i> G4]                          |
| gj 160697735 | 4.2 | pmbA protein [ <i>B.mallei</i> ATCC 10399]                                                       |
| gj 83720849  | 4.2 | polyketide synthase [ <i>B.thailandensis</i> E264]                                               |
| gj 91778311  | 4.2 | Putative senescence marker protein-30 (SMP-30) [ <i>B.xenovorans</i> LB400]                      |
| gj 91781641  | 4.2 | Na <sup>+</sup> /phosphate symporter [ <i>B.xenovorans</i> LB400]                                |

|              |     |                                                                                                    |
|--------------|-----|----------------------------------------------------------------------------------------------------|
| gij115350981 | 4.1 | UDP-glucose 6-dehydrogenase [ <i>B.ambifaria</i> AMMD]                                             |
| gij115358008 | 4.1 | RNA polymerase sigma factor RpoD [ <i>B.ambifaria</i> AMMD]                                        |
| gij115358570 | 4.1 | Poly-beta-hydroxybutyrate polymerase domain protein [ <i>B.ambifaria</i> AMMD]                     |
| gij134295511 | 4.1 | valyl-tRNA synthetase [ <i>B.vietnamiensis</i> G4]                                                 |
| gij171320557 | 4.1 | lipoprotein, YaeC family [ <i>B.ambifaria</i> MEX-5]                                               |
| gij83716219  | 4.1 | JamP [ <i>B.thailandensis</i> E264]                                                                |
| gij83717801  | 4.1 | hypothetical protein BTH_I12167 [ <i>B.thailandensis</i> E264]                                     |
| gij91785036  | 4.1 | hypothetical protein Bxe_A0744 [ <i>B.xenovorans</i> LB400]                                        |
| gij115358875 | 4   | porin, Gram-negative type [ <i>B.ambifaria</i> AMMD]                                               |
| gij116689945 | 4   | trigger factor [ <i>B.cenocepacia</i> HI2424]                                                      |
| gij160698338 | 4   | tryptophanyl-tRNA synthetase [ <i>B.mallei</i> ATCC 10399]                                         |
| gij189350945 | 4   | two-component system nitrogen regulation response regulator [ <i>B.multivorans</i> ATCC 17616]     |
| gij189351008 | 4   | conserved hypothetical protein [ <i>B.multivorans</i> ATCC 17616]                                  |
| gij115352235 | 3.9 | nitrogen metabolism transcriptional regulator, NtrC, Fis Family [ <i>B.ambifaria</i> AMMD]         |
| gij115352911 | 3.9 | outer membrane lipoprotein LolB [ <i>B.ambifaria</i> AMMD]                                         |
| gij116690941 | 3.9 | extracellular solute-binding protein, family 5 [ <i>B.cenocepacia</i> HI2424]                      |
| gij116692829 | 3.9 | porin, Gram-negative type [ <i>B.cenocepacia</i> HI2424]                                           |
| gij134292209 | 3.9 | Carbamoyl-phosphate synthase L chain, ATP-binding [ <i>B.vietnamiensis</i> G4]                     |
| gij134294432 | 3.9 | 50S ribosomal protein L1 [ <i>B.vietnamiensis</i> G4]                                              |
| gij134294682 | 3.9 | ribonucleotide-diphosphate reductase subunit alpha [ <i>B.vietnamiensis</i> G4]                    |
| gij134297017 | 3.9 | phosphoenolpyruvate-protein phosphotransferase [ <i>B.vietnamiensis</i> G4]                        |
| gij189350645 | 3.9 | ATP-dependent Clp protease ATP-binding subunit [ <i>B.multivorans</i> ATCC 17616]                  |
| gij115352620 | 3.8 | multicopper oxidase, type 3 [ <i>B.ambifaria</i> AMMD]                                             |
| gij134291911 | 3.8 | mannose-1-phosphate guanylyltransferase/mannose-6-phosphate isomerase [ <i>B.vietnamiensis</i> G4] |
| gij134295671 | 3.8 | putative serine protein kinase, PrkA [ <i>B.vietnamiensis</i> G4]                                  |
| gij134296834 | 3.8 | phosphoglycerate kinase [ <i>B.vietnamiensis</i> G4]                                               |
| gij161621317 | 3.8 | 23S rRNA 5-methyluridine methyltransferase [ <i>B.xenovorans</i> LB400]                            |
| gij115351335 | 3.7 | glutaminyl-tRNA synthetase [ <i>B.ambifaria</i> AMMD]                                              |
| gij115359594 | 3.7 | GCN5-related N-acetyltransferase [ <i>B.ambifaria</i> AMMD]                                        |
| gij116686584 | 3.7 | RND efflux system, outer membrane lipoprotein, NodT family [ <i>B.cenocepacia</i> HI2424]          |
| gij116690040 | 3.7 | 30S ribosomal protein S2 [ <i>B.cenocepacia</i> HI2424]                                            |
| gij134294435 | 3.7 | DNA-directed RNA polymerase subunit beta [ <i>B.vietnamiensis</i> G4]                              |
| gij134295121 | 3.7 | fumarate hydratase [ <i>B.vietnamiensis</i> G4]                                                    |
| gij23820938  | 3.7 | glucose dehydrogenase [ <i>B.cepacia</i> ]                                                         |
| gij115351586 | 3.6 | iron-hydroxamate transporter permease subunit [ <i>B.ambifaria</i> AMMD]                           |
| gij115358296 | 3.6 | dihydroxy-acid dehydratase [ <i>B.ambifaria</i> AMMD]                                              |
| gij115358839 | 3.6 | hydroxylamine reductase [ <i>B.ambifaria</i> AMMD]                                                 |
| gij116688364 | 3.6 | DNA-directed RNA polymerase subunit beta [ <i>B.cenocepacia</i> HI2424]                            |

|              |     |                                                                                                                                                |
|--------------|-----|------------------------------------------------------------------------------------------------------------------------------------------------|
| gj 116690212 | 3.6 | acetyl-CoA synthetase [ <i>B.cenocepacia</i> HI2424]                                                                                           |
| gj 116690792 | 3.6 | acetyl-CoA acetyltransferase [ <i>B.cenocepacia</i> HI2424]                                                                                    |
| gj 134295959 | 3.6 | trigger factor [ <i>B.vietnamiensis</i> G4]                                                                                                    |
| gj 160697439 | 3.6 | acetate--CoA ligase [ <i>B.mallei</i> ATCC 10399]                                                                                              |
| gj 189351369 | 3.6 | RND efflux system outer membrane lipoprotein [ <i>B.multivorans</i> ATCC 17616]                                                                |
| gj 189352150 | 3.6 | aconitate hydratase 2 [ <i>B.multivorans</i> ATCC 17616]                                                                                       |
| gj 116692055 | 3.5 | tryptophan synthase subunit beta [ <i>B.cenocepacia</i> HI2424]                                                                                |
| gj 189348990 | 3.5 | DNA topoisomerase type I [ <i>B.multivorans</i> ATCC 17616]                                                                                    |
| gj 115360455 | 3.4 | nitrate reductase, alpha subunit [ <i>B.ambifaria</i> AMMD]                                                                                    |
| gj 134293725 | 3.4 | nitrite reductase (NAD(P)H), large subunit [ <i>B.vietnamiensis</i> G4]                                                                        |
| gj 134294238 | 3.4 | F0F1 ATP synthase subunit beta [ <i>B.vietnamiensis</i> G4]                                                                                    |
| gj 189351801 | 3.4 | elongation factor EF-G [ <i>B.multivorans</i> ATCC 17616]                                                                                      |
| gj 91783628  | 3.4 | Putative alcohol dehydrogenase cytochrome c subunit precursor, cytochrome c553 [ <i>B.xenovorans</i> LB400]                                    |
| gj 171317669 | 3.3 | Lysine decarboxylase [ <i>B.ambifaria</i> MEX-5]                                                                                               |
| gj 100914669 | 3.2 | hypothetical protein Bmal10_03004030 [ <i>B.mallei</i> 10399]                                                                                  |
| gj 115357994 | 3.2 | DNA polymerase I [ <i>B.ambifaria</i> AMMD]                                                                                                    |
| gj 171319466 | 3.2 | 3-oxoacyl-(acyl-carrier-protein) synthase 2 [ <i>B.ambifaria</i> MEX-5]                                                                        |
| gj 171319605 | 3.2 | extracellular solute-binding protein family 5 [ <i>B.ambifaria</i> MEX-5]                                                                      |
| gj 189351669 | 3.2 | peptide/nickel transport system substrate-binding protein [ <i>B.multivorans</i> ATCC 17616]                                                   |
| gj 53722877  | 3.2 | LysR-family transcriptional regulator [ <i>B.pseudomallei</i> K96243]<br>LysR-family transcriptional regulator [ <i>B.pseudomallei</i> K96243] |
| gj 115350225 | 3.1 | CheA signal transduction histidine kinases [ <i>B.ambifaria</i> AMMD]                                                                          |
| gj 115351159 | 3.1 | thiamine biosynthesis protein ThiC [ <i>B.ambifaria</i> AMMD]                                                                                  |
| gj 134295353 | 3.1 | carbamoyl phosphate synthase small subunit [ <i>B.vietnamiensis</i> G4]                                                                        |
| gj 134295836 | 3.1 | HflK protein [ <i>B.vietnamiensis</i> G4]                                                                                                      |
| gj 171317285 | 3.1 | extracellular solute-binding protein family 5 [ <i>B.ambifaria</i> MEX-5]                                                                      |
| gj 189351515 | 3.1 | acetyl-CoA C-acetyltransferase [ <i>B.multivorans</i> ATCC 17616]                                                                              |
| gj 91784259  | 3.1 | dihydrolipoamide acetyltransferase [ <i>B.xenovorans</i> LB400]                                                                                |
| gj 91784987  | 3.1 | Translation elongation factor G [ <i>B.xenovorans</i> LB400]                                                                                   |
| gj 116688760 | 3   | globin [ <i>B.cenocepacia</i> HI2424]                                                                                                          |
| gj 116689038 | 3   | aminopeptidase N [ <i>B.cenocepacia</i> HI2424]                                                                                                |
| gj 116689431 | 3   | alanyl-tRNA synthetase [ <i>B.cenocepacia</i> HI2424]                                                                                          |
| gj 116689668 | 3   | hypothetical protein Bcen2424_1646 [ <i>B.cenocepacia</i> HI2424]                                                                              |
| gj 116690264 | 3   | NADH dehydrogenase subunit G [ <i>B.cenocepacia</i> HI2424]                                                                                    |
| gj 134283477 | 3   | metallo-beta-lactamase family protein [ <i>B.pseudomallei</i> 305]                                                                             |
| gj 134294734 | 3   | leucyl-tRNA synthetase [ <i>B.vietnamiensis</i> G4]                                                                                            |
| gj 33570923  | 3   | elongation factor Tu [Bordetella pertussis Tohama I]                                                                                           |
| gj 116693052 | 2.9 | Enoyl-CoA hydratase/isomerase [ <i>B.cenocepacia</i> HI2424]                                                                                   |
| gj 134294272 | 2.9 | glycine dehydrogenase [ <i>B.vietnamiensis</i> G4]                                                                                             |
| gj 134296685 | 2.9 | isoleucyl-tRNA synthetase [ <i>B.vietnamiensis</i> G4]                                                                                         |
| gj 171321878 | 2.9 | transporter, hydrophobe/amphiphile efflux-1 (HAE1) family [ <i>B.ambifaria</i> MEX-5]                                                          |
| gj 115351787 | 2.8 | RNA binding S1 domain protein [ <i>B.ambifaria</i> AMMD]                                                                                       |
| gj 116689531 | 2.8 | dihydrolipoamide acetyltransferase [ <i>B.cenocepacia</i> HI2424]                                                                              |
| gj 167839999 | 2.8 | hypothetical protein Bpse38_25219 [ <i>B.thailandensis</i> MSMB43]                                                                             |
| gj 171321879 | 2.8 | RND efflux system, outer membrane lipoprotein, NodT family                                                                                     |



|              |     |                                                                                                         |
|--------------|-----|---------------------------------------------------------------------------------------------------------|
|              |     | [ <i>B.ambifaria</i> MEX-5]                                                                             |
| gj 53722078  | 2.8 | hypothetical bacteriophage replication protein [ <i>B.pseudomallei</i> K96243]                          |
| gj 134294497 | 2.7 | Glutamate synthase (ferredoxin) [ <i>B.vietnamiensis</i> G4]                                            |
| gj 134296700 | 2.7 | translation elongation factor G [ <i>B.vietnamiensis</i> G4]                                            |
| gj 115352110 | 2.6 | chromosome segregation protein SMC [ <i>B.ambifaria</i> AMMD]                                           |
| gj 115359514 | 2.6 | porin, Gram-negative type [ <i>B.ambifaria</i> AMMD]                                                    |
| gj 116690620 | 2.6 | periplasmic solute binding protein [ <i>B.cenocepacia</i> HI2424]                                       |
| gj 134295001 | 2.6 | thioredoxin reductase [ <i>B.vietnamiensis</i> G4]                                                      |
| gj 171320857 | 2.6 | translation elongation factor G [ <i>B.ambifaria</i> MEX-5]                                             |
| gj 189349581 | 2.6 | chaperonin GroEL [ <i>B.multivorans</i> ATCC 17616]                                                     |
| gj 189351613 | 2.6 | Amt family ammonium transporter [ <i>B.multivorans</i> ATCC 17616]                                      |
| gj 83719255  | 2.6 | elongation factor G [ <i>B.thailandensis</i> E264]                                                      |
| gj 161525461 | 2.5 | ATPase AAA-2 domain protein [ <i>B.multivorans</i> ATCC 17616]                                          |
| gj 115360252 | 2.4 | acetolactate synthase [ <i>B.ambifaria</i> AMMD]                                                        |
| gj 115360412 | 2.4 | ATPase AAA-2 domain protein [ <i>B.ambifaria</i> AMMD]                                                  |
| gj 134295072 | 2.4 | DNA gyrase subunit A [ <i>B.vietnamiensis</i> G4]                                                       |
| gj 189350910 | 2.4 | competence protein [ <i>B.multivorans</i> ATCC 17616]                                                   |
| gj 100916983 | 2.3 | hypothetical protein Bmal10_03001635 [ <i>B.mallei</i> 10399]                                           |
| gj 134291992 | 2.3 | Extracellular ligand-binding receptor [ <i>B.vietnamiensis</i> G4]                                      |
| gj 83718787  | 2.3 | pyruvate dehydrogenase subunit E1 [ <i>B.thailandensis</i> E264]                                        |
| gj 83721530  | 2.3 | dihydroaeruginic acid synthetase [ <i>B.thailandensis</i> E264]                                         |
| gj 91777514  | 2.3 | ABC xylose transporter, periplasmic ligand binding protein [ <i>B.xenovorans</i> LB400]                 |
| gj 116689403 | 2.2 | cellulose synthase operon C domain protein [ <i>B.cenocepacia</i> HI2424]                               |
| gj 134294300 | 2.2 | hypothetical protein Bcep1808_0177 [ <i>B.vietnamiensis</i> G4]                                         |
| gj 134295584 | 2.1 | dihydroliipoamide dehydrogenase [ <i>B.vietnamiensis</i> G4]                                            |
| gj 162228938 | 2.1 | acetyl-CoA synthetase [ <i>B.cenocepacia</i> HI2424]                                                    |
| gj 189351861 | 2.1 | branched-chain amino acid transport system substrate-binding protein [ <i>B.multivorans</i> ATCC 17616] |
| gj 116688365 | 2   | DNA-directed RNA polymerase subunit beta' [ <i>B.cenocepacia</i> HI2424]                                |
| gj 116693372 | 2   | peptidase S10, serine carboxypeptidase [ <i>B.cenocepacia</i> HI2424]                                   |
| gj 4128219   | 1.9 | transposase [ <i>B.cepacia</i> ]                                                                        |
| gj 83716416  | 1.9 | peptide synthetase, putative [ <i>B.thailandensis</i> E264]                                             |
| gj 91777244  | 1.9 | succinate dehydrogenase flavoprotein subunit [ <i>B.xenovorans</i> LB400]                               |
| gj 91778087  | 1.9 | Cellulose synthase (UDP-forming) [ <i>B.xenovorans</i> LB400]                                           |
| gj 91782419  | 1.9 | phosphoenolpyruvate carboxylase [ <i>B.xenovorans</i> LB400]                                            |
| gj 115352837 | 1.8 | FAD linked oxidase domain protein [ <i>B.ambifaria</i> AMMD]                                            |
| gj 116693762 | 1.8 | malate synthase G [ <i>B.cenocepacia</i> HI2424]                                                        |
| gj 171318018 | 1.8 | peptidase M61 domain protein [ <i>B.ambifaria</i> MEX-5]                                                |
| gj 189350329 | 1.8 | GTP-binding protein [ <i>B.multivorans</i> ATCC 17616]                                                  |
| gj 115358682 | 1.7 | protein of unknown function DUF470 [ <i>B.ambifaria</i> AMMD]                                           |
| gj 115359737 | 1.7 | hypothetical protein Bamb_4992 [ <i>B.ambifaria</i> AMMD]                                               |
| gj 116693816 | 1.7 | uncharacterized domain [ <i>B.cenocepacia</i> HI2424]                                                   |
| gj 134291880 | 1.7 | excinuclease ABC, A subunit [ <i>B.vietnamiensis</i> G4]                                                |
| gj 189350322 | 1.7 | translation initiation factor IF-2 [ <i>B.multivorans</i> ATCC 17616]                                   |
| gj 83716389  | 1.7 | Rhs element Vgr protein [ <i>B.thailandensis</i> E264]                                                  |

|              |     |                                                                                                 |
|--------------|-----|-------------------------------------------------------------------------------------------------|
| gij83721240  | 1.7 | dipeptide ABC transporter, periplasmic dipeptide-binding protein [ <i>B.thailandensis</i> E264] |
| gij160697538 | 1.6 | conserved hypothetical protein [ <i>B.mallei</i> ATCC 10399]                                    |
| gij100917414 | 1.5 | hypothetical protein Bmal10_03001163 [ <i>B.mallei</i> 10399]                                   |
| gij115361133 | 1.5 | chaperonin GroEL [ <i>B.ambifaria</i> AMMD]                                                     |
| gij167837458 | 1.5 | formate dehydrogenase, beta subunit [ <i>B.thailandensis</i> MSMB43]                            |
| gij167839356 | 1.5 | TonB-dependent siderophore receptor [ <i>B.thailandensis</i> MSMB43]                            |
| gij189351806 | 1.5 | DNA-directed RNA polymerase, beta subunit [ <i>B.multivorans</i> ATCC 17616]                    |
| gij52210850  | 1.5 | putative DnaK chaperone protein [ <i>B.pseudomallei</i> K96243]                                 |
| gij115351986 | 1.4 | putative DnaK chaperone protein [ <i>B.pseudomallei</i> K96243]                                 |
| gij189349722 | 1.4 | penicillin-binding protein, 1A family [ <i>B.ambifaria</i> AMMD]                                |
| gij189349722 | 1.4 | membrane alanyl aminopeptidase [ <i>B.multivorans</i> ATCC 17616]                               |
| gij189351805 | 1.4 | DNA-directed RNA polymerase, beta' subunit [ <i>B.multivorans</i> ATCC 17616]                   |
| gij134294436 | 1.3 | DNA-directed RNA polymerase subunit beta' [ <i>B.vietnamiensis</i> G4]                          |
| gij189348496 | 1.3 | type IV secretion system protein [ <i>B.multivorans</i> ATCC 17616]                             |
| gij53720952  | 1.3 | putative bacteriophage protein [ <i>B.pseudomallei</i> K96243]                                  |
| gij116689662 | 1.2 | amino acid adenylation domain [ <i>B.cenocepacia</i> HI2424]                                    |
| gij91784463  | 1.2 | Putative Transcriptional regulator, Fis family [ <i>B.xenovorans</i> LB400]                     |
| gij171320877 | 1.1 | methionyl-tRNA synthetase [ <i>B.ambifaria</i> MEX-5]                                           |
| gij134280841 | 1   | Chaperone clpB [ <i>B.pseudomallei</i> 305]                                                     |
| gij100917296 | 0.8 | hypothetical protein Bmal10_03001521 [ <i>B.mallei</i> 10399]                                   |
| gij171320382 | 0.8 | Beta-ketoacyl synthase [ <i>B.ambifaria</i> MEX-5]                                              |
| gij83718897  | 0.8 | peptide synthetase, putative [ <i>B.thailandensis</i> E264]                                     |
| gij160698787 | 0.7 | valyl-tRNA synthetase [ <i>B.mallei</i> ATCC 10399]                                             |
| gij189350474 | 0.7 | D-alanine-poly(phosphoribitol) ligase [ <i>B.multivorans</i> ATCC 17616]                        |
| gij189352577 | 0.7 | superfamily II helicase [ <i>B.multivorans</i> ATCC 17616]                                      |
